# Supplementary material for: Development and psychometric properties of the Portuguese version of the Orofacial Esthetic Scale: OES-Pt
Source: PeerJ. 2020 Mar 17;8:e8814. doi: 10.7717/peerj.8814 (PMC7083155; doi:10.7717/peerj.8814)
Supplement: Supplemental Information 1 [file peerj-08-8814-s001.xlsx]

## Sheet: Labels
Column	Label	Description
A	Code_identification	Participant identification code
B	Age	Participant Age (in complete years)
C	Gender	0=Male, 1=Female
D	Marital Status	1=Single, 2=Married, 3=Widowed, 4=Divorced
E	Treatment	Question: "Are you undergoing dental treatment?"; 0=No; 1=Yes
F	Have_ever_been_esthetic_treatement	Question: "Have you ever been under any kind of esthetic dental treatment in your life?" 0=No, 1=Yes
G	in_Esthetic_Treatment	Question: "Are you currently under esthetic dental treatment?" 0=No, 1=Yes
H	Like_Smile	Question: "Do you like your smile?" 0=No, 1=Yes
I	Economic_Stratum	Stratum D and E=1; Class C=2; Class B and A=3
J	OES1	Response to the Item 1 of the Portuguese Version of Orofacial Esthetic Scale
K	OES2	Response to the Item 2 of the Portuguese Version of Orofacial Esthetic Scale
L	OES3	Response to the Item 3 of the Portuguese Version of Orofacial Esthetic Scale
M	OES4	Response to the Item 4 of the Portuguese Version of Orofacial Esthetic Scale
N	OES5	Response to the Item 5 of the Portuguese Version of Orofacial Esthetic Scale
O	OES6	Response to the Item 6 of the Portuguese Version of Orofacial Esthetic Scale
P	OES7	Response to the Item 7 of the Portuguese Version of Orofacial Esthetic Scale
Q	OES8	Response to the Item 8 of the Portuguese Version of Orofacial Esthetic Scale
R	OES-Pt_total_score	Mean of the answers given to the seven component items of the factorial model (OES1-OES7)
S	Group	Test or Validation Sample (0=Test Sample; 1=Validation Sample)

## Sheet: Study Participants
Code_identification	Age	Gender	Marital Status	Treatment	Have_ever_been_esthetic_treatement	in_Esthetic_Treatment	Like_Smile	Economic_Stratum	OES1	OES2	OES3	OES4	OES5	OES6	OES7	OES8	OES-Pt_total_score	Group
59	22	1	0	0	1	0	1	4	6	5	9	10	10	9	7	8	8	0
60	26	0	0	0	0	0	1	3	7	7	7	5	7	6	7	7	6.57143	0
61	22	1	1	0	1	0	0	2	8	9	3	5	4	4	5	5	5.42857	1
62	27	1	0	1	1	0	1	3	7	7	7	6	6	2	7	7	6	1
63	26	1	0	0	1	0	0	3	9	9	0	0	0	0	5	5	3.28571	1
64	37	1	1	1	1	1	0	2	8	8	5	3	1	5	5	8	5	1
65	23	1	0	0	1	0	1	3	7	8	8	8	8	5	8	8	7.42857	1
66	37	1	1	0	0	0	0	2		0	0	0	0	0	0	0
67	40	1	1	1	1	0	1	3	7	6	7	7	7	7	7	7	6.85714	0
68	33	0	1	1	0	0	1	2	7	7	7	7	7	7	8	8	7.14286	0
69	35	1	1	1	1	0	1	4	8	6	8	8	8	6	8	8	7.42857	0
70	33	1	1	1	1	0	1	3	6	5	7	9	10	7	7	8	7.28571	0
71	28	1	1	1	1	1	0	2	8	6	5	5	7	7	10	8	6.85714	0
72	30	1	1	0	1	0	1	2	8	9	5	6	7	8	9	8	7.42857	1
73	26	1	1	1	0		0	3	7	7	8	8	8	6	8	8	7.42857	0
74	20	1	0	1	1	0	1	3	9	8	9	9	9	10	10	9	9.14286	0
75	18	1	0	1	0	0	1	3	8	8	9	9	9	6	10	8	8.42857	1
76	18	0	0	0	0	0	1	2	4	4	3	5	5	8	8	5	5.28571	0
77	31	1	1	0	1	0	1	3	9	9	10	10	10	9	9	9	9.42857	1
78	32	0	1	1	0	0	1	2	4		4	3	3	5	3	3
79	25	0	0	1	0	0	1	3	8	9	8	8	6	5	6	9	7.14286	0
80	19	1	0	1	1	0	1	2	3	2	5	2	6	4	5	6	3.85714	1
81	19	0	0	1	0	0	1	2	5	5	6	5		7	10	7
82	22	1	1	0	1	0	1	3	10	10	8	7	8	8	9	9	8.57143	1
83	19	1	0	1	0	0	0	3	5	0	0	0	0	0	5	1	1.42857	1
84	24	1	0	0	1	0	1	2	10	10	10	10	10	5	5	8	8.57143	0
85	19	1	0	0	1	0	1	3	9	9	10	10	10	10	10	10	9.71429	0
86	22	1	0	1	1	0	1	3	5	8	8	3	8	1	8	4	5.85714	1
87	22	1	0	0	0	0	1	3	4	1	5	4	5	2	6	6	3.85714	1
88	21	1	0	1	0	0	1	3	7	6	6	7	8	8	8	7	7.14286	1
89	22	1	0	1	1	0	1	4	10	10	10	10	10	6	10	10	9.42857	1
90	21	1	0	1	1	0	0	3	6	5	7	6	3	2	8	6	5.28571	0
91	34	0	0	0	1	0	1	3	5	5	6	1	8	6	6	7	5.28571	1
92	19	0	0	0	1	0	1	2	5	6	7	5	6	8	6	6	6.14286	1
93	24	1	0	0	0	0	1	2	5	5	6	6	6	2	5	5	5	1
94	27	1	0	0	1	0	1	3	10	10	10	10	10	7	10	10	9.57143	1
95	28	1	1	1	0	0	1	2	7	9	3	7	9	8	6	5	7	0
96	29	0	1	1	1	0	1	2	2	2	1	1	0	5	5	0	2.28571	0
97	22	1	0	1	0	0	1	2	5	5	5	5	5	5	5	5	5	0
98	26	1	1	0	0	1	0	4	8	3	4	5	4	2	2	5	4	0
99	30	1	1	1	0	1	0	2	5	0	0	0	0	0	0	2	0.714286	1
100	29	1	1	1	1	0	1	2	5	5	7	6	5		5	5
101	34	1	0	1	1	0	1	2	7	8	3	2	6	0	6	7	4.57143	0
102	22	1	0	1	0	0	1	2	10	10	10	3	3	5	8	9	7	1
103	37	1	1	0	1	0	1	3	9	7	10	10	10	7	10	9	9	0
104	26	0	0	0	1	0	1	2	10	10	10	10	10	10	10	10	10	0
105	26	1	0	0	0	0	1	2	10	10	10	10	10	5	5	8	8.57143	0
106	20	0	0	1	0	0	1	3	5	4	5	5	5	8	7	4	5.57143	1
107	34	1	1	0	0	0	1	2	10	4	8	8	10	10	3	10	7.57143	0
108	19	1	0	1	0	0	1	3	9	9	9	8	10	10	10	10	9.28571	1
109	26	1	0	1	0	0	0	3	1	1	1	8	5	4	8	2	4	1
110	24	1	1	1	0	0	1	2	8	8	7	7	7	7	6	8	7.14286	1
111	28	1	0	0	0	0	0	2	4	4	3	2	3	3	1	2	2.85714	0
112	27	1	1	1	0	0	1	2	8	8		6	6	6	8	8
113	30	1	1	1	0	1	1	3	10	10	10	10	10	8	10	10	9.71429	0
114	35	1	2	0	0	1	1	2	5	5	3	3	3	3	3	3	3.57143	1
115	31	1	2	0	1	1	1	2	6	4	3	3	8	3	7	6	4.85714	1
116	40	1	1	1	1	0	1	4	8	8	8	8	8	6	8	8	7.71429	1
117	35	1	1	0	1	0	1	4	10	10	10	10	10	8	10	10	9.71429	0
118	22	1	1	1	1	1	0	2	2	2	2	2		5	5	1
119	18	1	0	1	1	0	0	2	5	5	6	0	0	5	10	3	4.42857	0
120	30	0	0	0	1	0	1	4	9	5	9	9	9	9	9	9	8.42857	0
121	30	0	0	0	1	0	1	4	9	10	10	8	10	9	10	10	9.42857	0
122	28	1	0	1	1	1	1	3	10		9	10	9	9	9	10
123	29	0	0	0	0	0	1	2	6	6	7	7	7	5	8	7	6.57143	1
124	26	0	0	1	0	1	1	4	8	8	8	5	8	8	8	8	7.57143	1
125	24	0	0	0	1	0	1	3	8	9	9	9	9	5	10	8	8.42857	0
126	29	1	0	1	0	1	1	2	7	7	8	8	7	7	7	8	7.28571	1
127	23	1	0	1	1	0	1	3	10	10	8	8	8	8	10	10	8.85714	1
128	38	1	0	1	1	0	1	2	8	8	9	9	8	10	9	9	8.71429	0
129	29	1	1	1	1	0	1	3	5	5	5	2	2	2	3	5	3.42857	0
130	27	1	1	1	1	0	1	3	7	7	2	2	1	2	7	6	4	0
131	29	1	0	0	1	0	1	2	6	3	7	8	8	8	10	8	7.14286	1
132	29	1	1	0	0	0	0	3	5	5	6	5	5	4	7	7	5.28571	0
133	30	0	1	0	0	0	1	3	9	8	7	7	7	6	7	7	7.28571	1
134	32	1	1	0	0	0	1	3	5	5	6	2	2	2	5	5	3.85714	1
135	29	1	0	0	0	0	1	3	9	8	9	7	8	6	8	10	7.85714	1
136	23	1	0	0	1	0	1	2	8	8	8	8	9	6	8	8	7.85714	0
137	30	1	1	0	1	0	1	3	7	7	8	8	5	5	4	5	6.28571	0
138	35	1	0	0	1	0	0	2	5	5	1	1	1	7	8	5	4	0
139	23	1	0	0	1	0	1	2	10	10	10	10	9	9	9	10	9.57143	1
140	24	1	0	0	1	0	1	3	10	10	10	1	3	5	8	10	6.71429	0
141	27	1	0	0	1	0	1	3	5	2	10	10	10	0	10	6	6.71429	0
142	24	1	0	0	0	0	1	2	10	10	10	10	10	10	10	10	10	0
143	26	1	0	0	1	0	1	2	5	5	4	5	5	3	3	5	4.28571	1
144	21	1	0	0	0	0	1	3	8	8	9	7	7	6	9	8	7.71429	0
145	21	1	0	0	1	0	1	4	7	7	3	3	5	2	5	7	4.57143	0
146	28	1	1	0	0	0	1	3	8	7	9	8	9	5	5	9	7.28571	1
147	29	1	0	0	1	0	1	3	8	4	9	7	6	6	5	8	6.42857	0
148	27	1	0	0	1	0	1	3	4	4	4	7	7	6	6	5	5.42857	1
150	30	1	1	0	0	0	1	3	5	5	7	7	5	7	7	7	6.14286	0
152	39	1	1	0	1	0	0	4	5	5	6	8	0	7	10	8	5.85714	0
153	30	1	1	0	1	0	1	3	10	10	10	10	10	10	10	10	10	0
154	24	1	0	0	1	0	1	3	10	10	10	10	10	10	10	10	10	1
155	30	1	1	0	0	0	1	2	10	9	10	10	10	10	10	10	9.85714	0
156	18	1	0	1	0	1	1	3	5	8	6	4	5	7	5	5	5.71429	1
157	21	1	0	0	1	0	1	3	7	7	8	9	8	9	8	8	8	1
158	33	1	1	1	0	0	1	2	7	7	7	10	10	2	10	9	7.57143	0
159	24	1	0	1	1	0	1	3	8	8	5	8	7	8	8	8	7.42857	1
160	21	0	0	0	0	0	1	3	10	10	10	10	10	5	10	10	9.28571	1
161	21	1	0	0	1	0	1	3	9	9	9	10	10	5	10	9	8.85714	0
162	34	1	1	1	1	0	1	3	7	7	9	10	10	6	5	8	7.71429	1
163	32	1	0	0	1	0	1	3	4	5	7	9	8	8		5
164	20	0	0	1	0	0	0	3	8	9	6	4	5	6	8	7	6.57143	1
165	32	1	0	1	0	1	0	1	1	1	1	1	1	1	1	1	1	1
166	32	1	1	1	1	0	1	3	7	7	6	5	5	7	0	6	5.28571	0
167	30	1	0	0	1	0	0		4	7	3	4	2	1	2	1	3.28571	1
168	30	1	1	0	0	0	1	2	10	10	10	10	10	10	10	10	10	1
169	29	1	1	0	1	0	1	3	9	10	8	9	8	6	7	9	8.14286	0
170	25	1	0	0	1	0	0	4	5	2	5	2	2	2	1	4	2.71429	1
171	30	1	0	0	1	0	1	4	9	6	7	8	9	9	8	8	8	0
172	19	0	0	0	1	0	1	4	8	6	7	8	7	7	5	7	6.85714	0
174	21	0	0	0	1	0	1	4	8	9	8	8	9	9	9	9	8.57143	1
175	20	0	0	0	1	0	1	3	8	8	8	9	8	7	8	8	8	0
176	20	0	0	1	1	0	1	4	8	8	7	6	8	3	8	7	6.85714	1
177	20	0	0	0	1	0	0	3	8	8	7	8	8	7	8	8	7.71429	0
178	19	0	0	0	1	0	1	4	8	8	8	9	9	9	9	8	8.57143	0
179	23	1	0	0	1	0	1	4	8	6	7	8	9	9	9	8	8	0
180	20	0	0	0	0	0	0	3	7	7	7	5	9	8	9	7	7.42857	0
185	20	1	0	1	0	0	0	3	8	6	7	4	7	3	3	7	5.42857	0
186	24	1	0	0	1	0	1	4	10	10	10	9	10	10	10	10	9.85714	1
187	23	1	0	0	1	0	1	4	5	4	7	7	8	7	4	6	6	0
188	22	1	0	0	1	0	0	4	4	3	4	3	4	6	10	4	4.85714	1
189	37	1	3	0	0	0	1	2	9	8	8	7	9	9	10	9	8.57143	1
190	21	1	0	1	0	0	1	3	8	7	9	7	8	6	8	9	7.57143	0
191	26	1	0	1	0	0	1	3	5	5	5	5	6	4	7	8	5.28571	0
192	18	1	0	0	1	0	1	3	9	9	8	8	9	9	9	10	8.71429	0
194	34	1	1	1	0	0	1	3	7	7	7	7	7	7	7	8	7	1
195	29	1	1	1	0	0	1	2	7	7	7	8	8	2	2	7	5.85714	1
196	20	1	0	1	0	0	0	2	4	4	4	0	9	9	9	4	5.57143	1
197	26	0	0	0	1	0	1	4	10	10	10	5	10	10	10	9	9.28571	1
199	40	1	0	0	1	0	1	2	8	8	8	8	8	5	8	8	7.57143	0
200	23	1	0	0	0	0	0	1	4	4	4	4	4	5	4	7	4.14286	0
201	31	0	1	1	0	0	0	3	6	6	4	4	4	4	6	5	4.85714	1
202	20	1	0	1	0	0	1	3	6	6	5	5		4	7	7
203	27	1	1	1	0	0	0	2	0	0	0	2	1	1	2	1	0.857143	1
204	23	1	0	0	1	0	1	3	6	6	6	6	5	6	6	9	5.85714	1
205	18	1	0	0	0	0	1	2	7	5	5	3	2	4	8	3	4.85714	0
206	35	1	1	1	1	0	1	4	5	5	9	9	9	9	9	8	7.85714	0
207	21	1	0	1	1	0	1	2	4	4	3	5	5	5	4	6	4.28571	0
208	23	1	1	1	1	0	1	3	6	6	6	5	5			5
209	31	1	1	1	1	0	0	3	7	3	5	6	5	10	6	6	6	0
210	25	1	0	0	1	0	0	2	7	7	6	5	6	5	7	7	6.14286	0
211	35	0	0	1	0	0	1	3	10	10	9	9	10	10	10	9	9.71429	0
212	25	1	0	0	1	0	1	4	8	8	9	9	9	9	9	9	8.71429	0
213	24	1	1	1	0	0	0	3	8	4	4	4	2	7	7	6	5.14286	1
214	19	1	0	0	1	0	1	3	7	7	8	7	8	7	8	7	7.42857	1
216	23	0	1	0	1	0	0	3	7	6	4	4	3	3	10	7	5.28571	1
217	40	1	1	0	1	0	1	3	10	10	10	10	10	4	10	10	9.14286	1
218	38	1	1	1	1	0	0	2	6	4	5		4	10	10	8
220	26	1	1	1	1	0	0	2	3	2	0	1	0	0	6	9	1.71429	0
221	30	1	1	0	0	0	1	3	4	6	7	7	6	7	7	7	6.28571	1
222	27	1	1	0	1	0	0	3	0	0	0	0	0	0	0	0	0	0
223	23	1	1	0	0	0	1	3	8	8	7	7	6	6	6	7	6.85714	0
224	38	1	1	0	0	0	1	4	0	0		0	9	9	9	9
226	22	1	0	1	0		1	4	6	3	8	9	9	6	3	9	6.28571	1
227	30	1	0	1	0	0	0	1	10	9	9	7	4	4	3	3	6.57143	0
228	21	0	0	1	0	0	1	3	10	10	10	10	10	10	10	10	10	0
229	21	0	0	0	0	1	0	3	6	6	3	3	1	7	5	6	4.42857	1
230	21	1	0	1	0	0	0	3	5	2	4	1	6	8	8	5	4.85714	0
231	25	1	0	0	0	1	1	4	10	10	10	10	10	7	10	10	9.57143	0
232	21	1	0	0	1	0	1	3	8	6	9	9	9	9	9	8	8.42857	1
233	21	1	0	0	1	0	1	3	7	7	6	6	7	7	7	7	6.71429	0
234	22	1	0	0	1	0	0	3	3	3	0	0	1	0	0	3	1	0
235	23	1	0	0	1	0	1	3	8	8	9	9	9	8	8	8	8.42857	0
236	23	1	0	0	1	1	1	3	9	8	9	10	10	10	10	9	9.42857	1
237	29	1	1	1	0	0	1	3	7	7	7	9	8	5	4	7	6.71429	1
238	18	1	0	1	1	0	1	3	8	8	8	10	9	9	9	8	8.71429	0
240	34	1	1	0	0	0		2	0	0	0	0	0	0	0	0	0	0
241	27	1	0	1	1	1	0	3	3	4	2	2	2	0	4	3	2.42857	1
242	34	0	0	1	1	1	1	3	10	10	10	10	10	10	10	10	10	1
243	25	1	0	1	0	0	1	2	9	9	10	9	9	1	9	8	8	0
244	34	1	1	0	1	0	1	3	6	6	6	6	6	5	6	6	5.85714	0
245	34	0	1	1	1	0	1	3	7	6	4	4	5	5	6	6	5.28571	0
246	23	1	0	1	0	0	1	2	5	5	1	0	2		5	2
247	18	1	0	0	0	0	0	2	2	2	4	5		3	4	4
248	31	1	2	1	1	1	1	2	5	4	6	5	6	2	6	8	4.85714	1
249	28	1	0	1	0	0	0	2	5	5	3	3	3	1	5	1	3.57143	0
250	32	1	1	0	1	0	1	2	10	10	10	10	10	10	10	10	10	1
251	26	1	0	0	0	0	1	2	10	10	10	10	10	10	10	10	10	1
252	36	1	1	0	1	0	1	3	8	8	0	0	0	0	0	0	2.28571	0
253	30	0	0	1	0	0	1	2	8	8	8	7	9	6	6	8	7.42857	0
254	31	1	1	1	0	0	1	2	10	10	0	0	0	0	10	0	4.28571	1
255	29	1	0	1	1	0	1	2	1	1	2	2	3	1	1	1	1.57143	1
256	36	1	2	1	1	0	1	3	10	10	10	10	10	10	9	10	9.85714	1
257	25	1	1	1	0	0	1	2		10	10	9	9	9	9	10
258	18	1	0	1	0	0	1	3	10	10	10	10	10	6	4	10	8.57143	0
259	29	1	1	1	0	0	1	3	8	8	8	7	8	8	7	8	7.71429	0
260	35	1	2	1	0	0	1	4	5	7	5	3	3	5	5	5	4.71429	0
261	25	1	1	0	0	0	1	2	10	10		9	6	6	7	10
262	40	1	2	1	0	0	1	3	4	3	5	5	5	5	7	5	4.85714	1
263	27	1	0	0	0	0	0	3	5	5	5	5	5	5	5	5	5	0
264	20	1	0	0	1	0	1	4	5	5	7	5	5	4	4	7	5	0
265	24	1	0	1	1	0	1	3	9	9	9	9	9	8	9	9	8.85714	1
266	21	1	0	1	1	0	1	2	9	9	9	9	9	9	9	10	9	0
267	30	1	1	0	0	0	0	2	4	4	3	0	0	5	5	4	3	1
268	25	1	1	1	0	0	1	2	6	5	7	6	8	2	1	8	5	0
269	32	1	0	1	0	0	1	3	9	9	9	7	7	5	9	9	7.85714	1
270	26	1	0	1	0	1	1	4	6	5	7	8	9	9	6	6	7.14286	0
272	31	1	0	1	0	0	0	3	10	10	10	10	10	7	10	10	9.57143	1
273	29	1	1	0	0	0	1	2	5	5	5	3	3	3	5	7	4.14286	0
274	36	1	0	0	1	0	0	2	8	9	9	7	7	9	9	10	8.28571	0
275	22	0	0	0	1	0	0	3	2	6	2	1	4	3	1	1	2.71429	1
276	19	1	0	1	0	1	0	2	7	7	6	5	5	5	7	6	6	1
277	21	1	2	1	0	0	1	1	8	8	8	9	9	5	8	7	7.85714	1
278	27	1	0	0	1	0	1	4	8	8	9	9	9	7	9	9	8.42857	0
279	38	0	1	1	0	0	0	2	7	6	4	3	2	2	2	4	3.71429	0
280	29	1	1	1	1	0	0	2	5	5	7	3	3	0	7	6	4.28571	1
281	29	1	0	1	0	0	0	3	7	8	8	4	0	3	8	4	5.42857	1
282	28	0	1	1	0	0	0	2	7	8	6	6	6	3	6	5	6	1
283	22	1	0	1	0	0	1	3	10	10	6	4	4	2	7	6	6.14286	1
284	30	0	0	0	0	0	1	3	8	8	7	6	7	6	6	7	6.85714	1
285	38	1	1	0	1	0	1	3	7	7	7	7	7	7	7	7	7	1
286	36	1	2	0	1	0	1	3	3	2	3	6		0	8	6
287	20	0	0	0	0	0	1	3	7	5	6	5	5	4	8	7	5.71429	0
288	39	1	1	1	1	0	1	4	8	8	8	8	8	8	8	8	8	1
289	18	0	0	1	0	0	1	4	9	9	9	8	9	7	9	10	8.57143	0
290	18	1	0	1	0	1	1	3	10	10	10	5	0	10		9
291	32	1	1	1	0	0	0	2	3	3	3	3	3	3	3	5	3	1
292	33	0	0	1	0	0	1	3	8	7	7	7	7	7	6	8	7	1
293	32	1	1	1	0	0	0	3	0	0	0	0	0	0	10	0	1.42857	1
294	36	0	1	0	0	0	0	3	0	0	0	0	0	0	10	0	1.42857	1
295	18	1	0	1	0	0	1	3	10	10	9	9	9	9	10	10	9.42857	1
296	18	0	0	1	0	0	0	3	7	8	8	7	6	6	8	7	7.14286	0
297	24	1	0	1	1	1	1	3	7	7	7	8	8	7	7	9	7.28571	1
298	36	0	0	1	0	1	1	2	7	7	7		7	5		7
299	40	0	1	0	1	0	1	3	10	10	10	10	10	10	10	10	10	0
300	33	0	1	0	1	0	1	3	9	9	10	9	10	9	9	10	9.28571	0
301	31	0	1	0	1	0	0	3	6	6	6	6	6	6	6	6	6	0
302	25	1	1	1	1	0	1	3	5	5	5	6	6	2	5	7	4.85714	1
303	22	0	0	1	1	0	0	3	6	6	8	7	7	0	1	6	5	0
306	40	1	1	0	0	0	1	2	8	9	5	5	4	3	5	6	5.57143	0
307	22	0	0	1	0	0	0	3	7	7	6	5	5	4	4	6	5.42857	1
308	20	1	0	0	0	0	0	3	4	4	3	3	3	3	3	2	3.28571	1
309	19	1	0	0	1	0	1	2	8	8	9	9	10	7	7	10	8.28571	1
310	32	1	1	1	0	0	0	2	0	0	10	10	10	10	0	10	5.71429	0
311	28	1	0	1	0	1	1	2	6	8	6	6	6	6	6	5	6.28571	0
312	36	1	2	1	1	0	1	3	6	6	7	7	8	4	9	8	6.71429	0
313	19	1	0	0	0	0	0	3	3	3	3	8	8	1	3	6	4.14286	1
314	18	0	0	1	1	1	1	3	8	7	7	7	8	6	10	9	7.57143	0
315	22	0	0	1	0	1	0	2	7	6	6	6	5	2	3	3	5	1
316	33	1	0	0	0	0	1	2	8	8	9	9	9	7	7	9	8.14286	0
317	24	1	1	0	1	0	0	2	9	9	9	9	9	9	9	9	9	1
318	33	1	0	1	0	0	1	2	6	6	7	7	8	5	5	7	6.28571	0
319	26	1	0	1	1	0	1	3	8	8	10	9	8	5	10	8	8.28571	1
320	29	1	1	1	0	0	0	2	5	5	3	2	2	6	6	7	4.14286	0
321	29	1	0	0	0	0	0	2	0	1	0	0	0	3	3	0	1	1
322	27	1	0	1	0	1	1	2	6	4	6	6	6	4	5	6	5.28571	1
323	38	1	1	0	1	0	0	3	6	6	6	6	6	6	4	6	5.71429	0
324	32	1	1	1	1	0	1	3	10	10	10	10	10	7	10	10	9.57143	0
325	35	1	1	0	1	0	1	2	10	10	7	7	7	7	7	7	7.85714	0
326	23	1	1	1	0	0	0	3	4	2	0	0	0	0	1	0	1	1
327	19	1	0	1	0	0	1	2	10	10	10	8	9	7	10	10	9.14286	1
328	21	0	0	1	0	0	1	2	1	0	0	0	1	0	2	2	0.571429	0
329	28	1	1	0	0	0	1	2	7	7	7	3	7	3	3	4	5.28571	1
330	29	0	0	1	0	0	1	3	7	7	5	5	5	6	5	3	5.71429	0
331	20	1	0	1	0	1	1	3	7	7	8	5	5	3	6	7	5.85714	0
332	22	1	0	1	0	1	1	2	7	7	8	5	7	7	7	7	6.85714	1
333	35	1		1	0	0	1	3	1	1	0	0	0	1	0	1	0.428571	0
334	27	1	1	1	1	0	0	3	5	7	10	2	2	2	7	5	5	0
335	23	1	1	0	1	0	1	2	8	9	9	7	6	8	7	10	7.71429	0
336	32	1	0	1	1	0	1	3	8	8	8	7	8	7	8	8	7.71429	0
337	37	1	2	1	0	1	1	3	6	6	6	6	6	6	5	5	5.85714	0
338	19	0	0	0	0	0	0	2	5	2	2	3	3	4	4	5	3.28571	1
339	19	1	0	1	0	0	1	3	5	4	4	3	5	2	2	5	3.57143	1
340	36	0	1	0	0	0	1	3	10	10	10	8	10	8	10	10	9.42857	0
341	37	1	2	0	1	0	0	2	5	5	5	5	3	3	10	5	5.14286	1
342	37	0	1	0	1	0	1	3	10	10	10	8	8	9	5	8	8.57143	1
343	34	1	1	0	1	0	1	3	9	9	8	8	8	6	7	8	7.85714	0
345	27	1	1	0	1	0	1	3	10	7	10	10	10	9	10	9	9.42857	1
346	37	1	1	0	1	0	1	3	8	8	8	9	10	10	10	9	9	0
347	39	0	0	1	0	1	1	3	9	8	8	8	9	9	10	9	8.71429	1
348	19	1	0	1	0		0	2	1	1	1	0	2	0	4	2	1.28571	1
350	23	1	0	0	1	0	1	3	9	9	10	10	10	10	10	10	9.71429	1
351	25	1	0	0	1	0	0	2	2	2	2	4	3	3	7	2	3.28571	1
353	35	0	1	0	0	0	1	3	5	5	6	8	8	5	8	6	6.42857	1
354	23	1	0	1	0	0	0	3	3	3	3	3	2	7	2	4	3.28571	1
355	24	0	0	0	0	0	0	4	5	8	3	2	1	9	7	5	5	1
356	22	1	0	0	1	0	1	4	7	8	10	10	10	7	10	8	8.85714	1
357	22	1	0	0	0	0	1	4	8	9	8	7	8	8	10	10	8.28571	0
358	23	1	0	1	1	0	0	4	7	5	4	5	8	5	2	5	5.14286	1
359	24	1	0	0	1	0	1	3	5	3	7	9	10	4	8	7	6.57143	0
360	22	0	0	0	0	0	0	4	7	7	7	6	6	6	10	9	7	0
361	18	0	0	0	0	0	1	4	8	10	9	9	9	7	9	9	8.71429	1
362	18	1	0	0	1	0	1	3	7	3	8	8	6	2	6	8	5.71429	1
363	32	1	1	0	1	0	0	2	7	8	6	6	6	6	8	5	6.71429	0
364	23	1	0	0	0	0	0	3	5	5	4	3	3	3	5	5	4	1
365	22	1	0	0	1	0	0	3	5	5	3	1	1	1	5	5	3	1
366	27	0	0	0	1	0	1	4	8	9	7	5	9	6	9	8	7.57143	1
367	19	1	0	0	0	0	1	4	10	9	10	9	10	9	9	10	9.42857	1
368	23	1	0	0	0	0	1	4	5	5	8	8	8	8	8	7	7.14286	1
369	26	1	0	0	0	0	1	3	5	4	6	7		4	7	5
370	22	0	0	0	0	0	1	2	6	5	8	10	10	8	9	7	8	1
371	23	1	0	0	0	0	0	3	1	2	2	1	2	1	2	1	1.57143	0
372	28	1	0	0	1	0	1	4	9	8	9	9	9	7	8	8	8.42857	1
373	34	1	0	1	1	0	1	2	1	5	1	7	1	2	1	3	2.57143	1
374	30	1	0	0	1	0	1	4	9	9	9	9	9	9	9	9	9	0
375	32	1	0	0	1	0	1	3	7	7	7	7	8	5	3	7	6.28571	0
376	33	1	0	0	1	0	1	3	8	8	8	8	8	6	8	8	7.71429	1
377	23	0	0	0	1	0	1	2	7	6	8	9	8	8	8	8	7.71429	1
378	24	1	0	0	1	0	1	3	8	7	8	9	9	9	9	9	8.42857	1
379	25	0	0	0	1	0	1	3	7	7	8	8	8	4	5	7	6.71429	1
380	23	1	0	0	0	0	1	2	7	5	5	2	2	2	7	6	4.28571	0
381	29	1	0	0	1	0	1	4	8	8	8	10	10	10	7	10	8.71429	0
382	28	0	0	0	1	0	1	4	3	3	6	9	9	8	8	5	6.57143	0
383	34	0	0	0	1	0	1	3	10	10	5	10	10	5	5	10	7.85714	0
384	40	0	1	0	1	0	1	4	9	10	10	10	10	8	8	10	9.28571	1
385	20	0	0	0	1	0	1	2	5	8	7	2	4	3	8	5	5.28571	1
386	22	0	0	0	1	0	1	3	7	7	8	5	8	8	5	6	6.85714	1
387	23	1	0	0	1	0	1	4	8	6	9	7	9	8	10	8	8.14286	0
389	22	0	0	0	1		1	3	7	7	7	7	6	6	6	7	6.57143	0
390	21	0	0	0	1	0	1	3	9	8	10	9	8	8	9	9	8.71429	0
391	18	0	0	0	1	0	1	3	7	7	6	7	7	7	8	9	7	1
392	25	0	0	0	0	0	1	2	7	7	8	6	8	9	7	7	7.42857	0
393	28	0	0	1	1	1	1	3	10	10	10	10	10	10	10	10	10	1
394	23	0	0	1	0	0	1	3	9	6	10	9	8	6	9	9	8.14286	1
396	22	1	0	1	0	0	1	2	8	8	8	8	8	8	4	8	7.42857	1
397	18	1	0	1	0	0	0	2	5	5	4	2	2	2		5
398	37	0	1	1	0		1	3	5	5	6	10	10	8	10	5	7.71429	0
399	19	0	0	0	0	0	1	2	8	8	9	9	9	9	9	8	8.71429	0
400	25	1	0	0	1	0	1	2	6	6	9	8	8	6	5	6	6.85714	1
401	23	1	0	0	1	0	1	4	7	5	8	8	8	7	7	7	7.14286	0
402	24	0	0	0	1	0	1	4	7	8	7	4	7	4	7	7	6.28571	0
403	25	0	0	0	1	0	1	2	8	8	4	3	4	2	4	7	4.71429	0
404	23	1	0	0	0	0	1	3	8	7	9	9	9	6	8	8	8	0
405	25	0	0	0	0	0	1	2	7	7	7	7	7	5	6	7	6.57143	1
406	21	1	0	0	1	0	0	4	5	5	5	5	5	5	5	7	5	0
407	21	0	0	0	0	0	1	3	8	8	8	8	8	8	8	8	8	0
408	20	1	0	0	1	0	1	4	7	7	9	10	10	9	10	7	8.85714	0
409	22	1	0	0	1	0	0	4	7	7	5	3	1	1	6	4	4.28571	0
410	23	1	0	0	0	0	1	3	8	9	7	9	7	7	10	9	8.14286	1
411	22	0	0	0	0	0	1	4	8	8	8	9	9	8	8	7	8.28571	1
412	21	1	0	0	1	0	1	3	7	7	6	0	4	4	2	7	4.28571	0
413	24	1	0	1	0	0	1	4	6	5	8	7	8	7	7	7	6.85714	0
414	22	1	0	0	1	0	0	3	6	4	1	3	3	3	3	6	3.28571	1
415	30	1	0	1	0	0	1	4	7	7	6	6	6	7	7	6	6.57143	0
416	31	1	1	1	0	0	1	2	10	10	9	9	9	9	10	10	9.42857	0
417	34	1	2	1	0	0	0	2	3	3		2	2	5	6	8
418	39	1	1	0	0	0	0	3	0	0	0	0	0	0	0	0	0	1
419	31	0	0	1	1	1	0	3	8	8	8	8	8	6	8	7	7.71429	1
420	22	0	0	1	0	0	1	3	5	6	5	6	7	7	7	8	6.14286	1
421	22	1	0	0	0		1	3	6	0	5	5	4	4	6	6	4.28571	1
422	28	0	0	0	0	0	1	3	4	4	6	4	4	1	4	5	3.85714	0
423	30	1	1	1	0	0	0	4	9	9	5	5	4	1	4	5	5.28571	1
424	20	1	0	0	0	0	1	3	5	5	7	7	7	4	7	6	6	0
425	23	1	1	0	1	0	0	2	2	0	0	0	0	0	7	0	1.28571	0
426	27	1	0	1	0	0	1	3	8	8	9	9	9	7	9	9	8.42857	0
427	29	0	0	1	1	1	1	3	8	8	9	9	9	9	9	9	8.71429	1
428	34	1	0	1	1	0	1	3	0	0	0	0	0	3	0	0	0.428571	1
429	24	1	0	0	1	0	1	4	6	7	6	6	6	4	6	8	5.85714	1
430	21	1	1	0	1	0	1	3	8	8	4	2	3	4	9	5	5.42857	0
431	22	1	0	0	1	0	1	2	9	9	9	8	8	6	4	9	7.57143	0
432	22	1	0	0	1	0	1	3	5	5	4	6	7	5	4	5	5.14286	1
433	18	0	0	0	1	0	1	2	8	8	7	8	7	7		8
434	21	1	0	0	1	0	0	3	8	8	8	8	8	8	8	8	8	1
435	21	1	0	0	1	0	0	4	7	5	6	6	6	3	4	6	5.28571	0
436	21	1	0	1	1	0	1	3	4	5	7	6	6	2	3	5	4.71429	0
437	35	1	0	0	0	0	1	2	4	4	4	3	3	3	6	6	3.85714	0
438	27	1	0	0	0	0	1	2	6	6	6	5	5	5	5	6	5.42857	0
439	22	1	0	0	1	0	1	4	5	5	10	10	10	9	10	7	8.42857	1
440	21	1	0	1	0	0	1	4	6	6	7	8	9	7	8	7	7.28571	1
441	24	1	0	0	1	0	1	3	9	9	9	9	9	9	9	9	9	1
442	18	1	0	0	1	0	1	2	8	5	9	7	10	3	6	7	6.85714	0
443	18	1	0	1	0	0	0	3	10	10	6	0	8	7	7	8	6.85714	1
444	18	0	0	1	0	0	1	2	5	2	8	4	8	3	2	6	4.57143	0
445	20	1	0	0	1	0	1	2	5	3	8	6	6	3	9	7	5.71429	1
447	39	1	1	1	0	1	1	3	7	6	7	8	10	9	10	7	8.14286	1
448	27	1	0	0	1	0	1	2	6	8	8	9	10	10	6	6	8.14286	0
449	37	0	1	0	0	0	0	3	2	2	4	2	2	2	2	2	2.28571	0
450	24	1	0	0	1	0	0	3	5	5	5	3	3	3	3	5	3.85714	0
451	26	0	0	0	1	0	1	3	10	10	10	10	10	10	10	10	10	1
452	18	1	0	0	1	0	1	3	8	8	8	8	8	8	8	8	8	1
453	25	1	0	0	1	0	1	3	8	8	10	10	10	10	3	9	8.42857	1
454	38	1	0	1	1	1	1	3	6	4	7	7	8	6	7	7	6.42857	1
455	39	1	0	1	1	0	1	3	7	7	9	7	6	8	9	7	7.57143	1
456	19	1	0	1	1	0	1	3	7	7	8	8	9	7	7	8	7.57143	1
457	33	1	2	0	1	0	1	3	10	9	9	9	9	2	9	8	8.14286	1
458	39	1	1	1	1	0	1	3	8	8	8	7	8	8	8	8	7.85714	1
459	23	0	0	0	0	0	1	4	9	9	8	9	9	7	5	8	8	1
460	18	1	0	1	1	0	1	3	8	7	9	8	8	8	9	9	8.14286	1
461	23	1	0	0	1	0	1	4	8	9	8	7	7	9	9	8	8.14286	0
462	22	1	0	0	1	0	1	3	7	6	10	8	8	8	10	8	8.14286	1
463	21	1	0	0	1	0	1	3	8	6	8	10	10	6	7	10	7.85714	0
464	22	1	0	0	1	0	1	4	6	6	7	7	7	7	6	7	6.57143	1
465	22	0	0	0	1	0	1	4	10	10	10	10	10	10	10	10	10	0
466	23	1	0	0	1	0	0	4	10	10	7	9	9	10	8	9	9	1
467	26	1	0	0	0	0	1	4	8	8	8	8	8	8	8	8	8	1
468	22	1	0	0	1	0	1	4	7	8	7	8	8	9	6	7	7.57143	1
469	22	1	0	0	1	0	1	4	8	8	8	8	7	7	7	7	7.57143	0
470	25	0	0	1	0	0	1	3	9	9	9	8	10	9	7	9	8.71429	1
471	27	0	0	0	0	0	1	3	8	8	9	10	10	7	10	8	8.85714	1
472	20	1	0	0	1	0	1	4	6	2	7	8	8	6	7	7	6.28571	1
474	26	1	0	1	0	1	1	3	8	8	9	10	9	5	9	8	8.28571	1
475	26	1	0	0	1	0	1	4	7	2	7	10	10	7	2	7	6.42857	0
477	21	0	0	0	0	0	1	4	8	8	8	8	8	9	10	9	8.42857	0
479	23	1	0	0	1	0	1	4	8	7	9	10	9	10	10	10	9	0
480	28	0	0	1	0	0	0	3	8	8	4	3	3	7	7	6	5.71429	0
481	22	1	0	0	0	0	1	2	10	10	10	6	7	5	10	10	8.28571	0
482	21	0	0	0	1	0	1	3	8	9	9	9	9	8	10	8	8.85714	1
483	35	0	0	0	0	0	1	2	6	7	8	8	8	9	10	10	8	1
484	23	0	0	0	1	0	0	4	7	7	2	8	8	2	7	6	5.85714	1
485	21	1	0	0	0	0	1	4	6	4	5	6	3	3	10	3	5.28571	0
486	27	1	0	1	0	0	1	3	7	7	8	8	8	7	8	8	7.57143	0
488	23	1	1	0	1	0	1	2	8	1	7	10	10	5	10	8	7.28571	0
489	26	0	0	0	1	0	1	2	8	8	8	8	8	8	8	8	8	1
490	23	1	0	0	1	0	0	4	7	8	7	7	7	8	8	7	7.42857	1
491	21	1	0	1	0	1	1	4	8	9	10	10	10	10	10	10	9.57143	0
499	25	1	0	0	0	0	1	3	7	7	8	9	9	8	10	8	8.28571	1
500	20	1	0	0	0	0	0	4	7	6	3	2	2	2	1	5	3.28571	0
502	40	1	1	0	1	0	0	4	7	6	5	7	7	5	5	5	6	0
503	28	1	0	0	0	0	1	3	8	4	8	6	8	8	8	8	7.14286	1
504	26	0	0	0	1	0	1	3	9	8	8	7	7	6	6	8	7.28571	1
506	30	0	0	0	1	0	1	3	7	10	9	7	10	8	10	9	8.71429	0
508	21	1	0	1	1	0	1	4	8	6	9	8	6	4	5	7	6.57143	0
509	30	1	0	1	1	1	1	4	8	9	9	9	9	7	10	9	8.71429	0
510	18	1	0	1	0	0	1	4	5	6	3	6	6	5	7	5	5.42857	1
512	23	1	0	0	1	0	1	4	8	7	8	9	7	7	9	8	7.85714	0
513	23	1	0	0	1	0	1	3	6	7	7	7	7	5	7	7	6.57143	0
514	24	1	0	0	1	0	0	3	8	8	9	8	8	5	5	8	7.28571	0
515	22	0	0	0	1	0	0	3	4	4	3	5	5	3	6	5	4.28571	0
516	36	1	0	0	1	0	1	3	10	10	10	10	10	0	10	10	8.57143	1
517	24	0	0	0	1	0	1	4	9	9	9	9	10	8	10	10	9.14286	0
518	25	1	0	0	1	0	1	3	8	8	8	8	8	6	8	8	7.71429	0
519	25	1	0	0	1	0	0	4	4	0	3	0	8	5	8	4	4	0
520	29	1	0	0	1	0	1	3	5	5	7	7	5	7	7	7	6.14286	0
521	18	1	0	0	1	0	0	4	8	9	7	7	6	4	7	9	6.85714	0
522	26	1	0	0	1	0	1	3	7	7	8	8	8	7	8	8	7.57143	0
523	23	1	0	0	1	0	1	4	7	6	6	8	8	8	6	8	7	0
524	26	0	0	0	1	0	1	3	10	10	10	8	10	9	10	10	9.57143	1
525	21	1	0	0	1	0	1	3	7	5	8	6	9	9	9	8	7.57143	0
526	22	0	0	1	1	0	1	4	7	7	7	3	7	8	7	7	6.57143	1
527	23	1	0	0	1	0	1	4	7	5	7	7	7	6	7	7	6.57143	0
534	28	1	0	0	1	0	1	4	8	8	9	8	9	9	10	8	8.71429	1
535	22	1	0	0	0	0	1	3	5	5	8	5	8	8	8	8	6.71429	1
536	34	1	1	0	1	0	1	3	6	9	9	7	8	5	5	7	7	1
539	23	1	0	0	1	0	0	4	7	7	6	6	6	6	7	7	6.42857	1
544	19	1	0	0	0	0	0	2	7	7	5	4	5	5	5	7	5.42857	0
545	18	0	0	1	0	1	0	2	0	0	0	0	0	0	0	0	0	1
552	20	1	0	0	1	0	1	2	7	2	7	9	9	8	8	8	7.14286	1
564	23	1	0	0	1	0	1	3	7	7	8	9	9	6	10	7	8	1
565	24	1	0	0	1	0	1	4	8	8	8	8	8	8	8	9	8	0
567	33	1	0	0	0	0	1	4	9	9	8	3	4	4	6	7	6.14286	0
568	26	1	0	0	0	0	1	3	8	8	8	7	8	7	9	8	7.85714	0
569	23	1	0	0	1	0		2	0	0	4	0	0	0	10	0	2	0
570	32	1	1	0	1	0		3	7	7	7	5	7	7	7	7	6.71429	1
571	36	1	1	0	0	1	1	3	5	7	7	7	8	7	7	7	6.85714	0
573	26	0	0	0	1	0	0	3	7	7	6	9	10	6	6	7	7.28571	1
574	23	0	0	0	1	0	1	3	5	5	8	7	7	7	7	7	6.57143	0
575	22	1	0	1	0	0	0	4	5	4	3	4	4	3	7	5	4.28571	1
576	24	0	0	0	0	0	1	3	8	8	8	8	6	8	8	9	7.71429	0
577	25	1	0	0	1	0	1	3		8	8	8	8	8	8	8
580	29	1	0	0	1	0	1	2	10	10	10	10	10	10	10	10	10	0
581	25	1	1	0	0	0	0	3	6	4	4	4	4	4		4
582	21	0	0	0	0	0	0	3	8	6	5	1	4	6	10	6	5.71429	1
583	28	1	0	0	1	0	1	3	8	7	9	7	7	5	3	5	6.57143	1
584	18	1	0	0	0	0	0	4	4	8	3	4	6	8		5
585	18	1	0	0	0	1		3	9	9	10	9	9	9	10	10	9.28571	1
587	18	1	0	0	0	0	1	3	9	9	8	9	8	8	9	8	8.57143	1
588	19	1	0	1	0	0	1	3	7		5	5	5	5	5	6
589	20	1	0	0	1	0	1	3	8	7	6	6	3		6	7
590	19	1	0	1	1	0	0	3	5	5	5	7	7	5	5	5	5.57143	1
591	20	1	0	0	1	0	1	3	8	8	8	8	8	5	8	8	7.57143	1
592	21	1	0	0	0	0	1	3	10	10	10	9	10	7	10	10	9.42857	1
593	20	1	0	0	1	0	1	3	4	8	8	8	8	6	8	7	7.14286	0
594	20	1	0	0	1	0	1	3	7	5	8	10	10	10	10	9	8.57143	1
595	21	1	0	1	1	0	1	4	7	7	7	7	7	5	7	7	6.71429	1
596	20	1	0	0	0	0	1	3	8	8	9	9	9	7	7	8	8.14286	1
597	20	1	0	0	0	0	1	3	8	8	10	10	10	5	10	9	8.71429	1
598	21	1	0	0	1	0	1	4	5	4	6	8	7	4	6	6	5.71429	1
599	18	1	0	0	0	0	1	4	5	6	6	7	6	5	8	6	6.14286	0
600	18	1	0	0	0	0	1	3	7	9	6	7	6	6	8	8	7	1
601	19	1	0	0	0	0	1	3	7	7	7	8	10	8	10	8	8.14286	0
602	19	1	0	0	1	0	1	3	6	6	8		6	3	4	7
603	19	0	0	0	1	0	1	3	5	5	5	7	7	4	8	6	5.85714	0
604	20	1	0	0	0	0	1	2	4	6	8	9	9	9	9	9	7.71429	1
605	23	0	0	0	1		1	3	8	7	6	8	9	2	5	5	6.42857	1
606	21	1	0	0	0	0	1	3	7	6	6	3	5	3	6	6	5.14286	1
607	20	1	0	0	1	0	1	3	8	8	9	10	10	7	3	7	7.85714	1
608	25	0	0	0	0	0	0	3	4	4	4	4	4	4	4	4	4	1
609	21	1	0	0	0	0	1	4	8	8	8	8	8	6	8	8	7.71429	1
610	23	1	0	0	1	0	1	4	5	5	7	5	10	5	5	7	6	1
611	27	1	0	0	1	0	0	4	10	8	8	4	7	6	8	9	7.28571	1
612	20	1	0	0	1	0	1	4	8	8	8	8	8	8	8	8	8	0
613	19	1	0	0	1	0	1	3	6	6	5	7	8	5	10	5	6.71429	1
614	21	1	0	0	1	0	1	3	7	7	8	8	8	6	7	8	7.28571	1
615	19	1	0	0	1	0	1	3	4	4	8	9	9	8	9	8	7.28571	1
616	23	1	0	1	1	0	1	3	6	7	7	7	7	4	7	8	6.42857	1
617	20	1	0	0	0	0	0	4	4	4	6	6	5	4	4	5	4.71429	0
618	21	1	0	0	1	0	1	4	4	2	4	7	8	8	8	5	5.85714	0
619	18	1	0	1	1	0	0	3	3	2	4	2	5	1	4	3	3	0
620	37	0	1	0	1	0	1	3	5	5	6	7	7	5	7	8	6	1
621	27	0	0	0	1	0	1	3	5	5	5	10	10	7	10	6	7.42857	0
622	20	0	0	0	1	0	1	3	8	8	7	7	7	7	8	8	7.42857	0
623	40	0	1	0	0	0	1	3	5	3	3	1	2		9	9
625	32	1	0	0	1	0	1	2	10	10	10	9	9	7	10	10	9.28571	0
626	18	1	0	0	0	0	1	2	7	7	8	8	7		5	7
627	19	1	0	1	1	1	1	4	7	6	6	4	3	6	4	5	5.14286	1
628	28	0	0	0	0	0	1	3	5	7	9	9	9	9	4	9	7.42857	0
629	23	1	1	0	0	0	1	3	6	7	8	8	8	8	8	9	7.57143	0
630	23	1	0	0	1	0	1	4	6	6	9	9	9	9	9	6	8.14286	1
631	24	1	1	0	0	0	1	3	7	5	8	8	7	7	7	7	7	1
632	19	1	0	1	0	1	0	2	6	3	8		5	2	10	5
633	20	0	0	0	1	0	1	3	8	8	10	10	10	10	8	9	9.14286	0
634	37	1	1	0	1	0	1	3	7	6	10	8	9	9	10	10	8.42857	0
635	31	1	1	1	0	1	1	4	6	10	10	9	10	10	10	9	9.28571	0
636	25	1	1	1	0	1	1	3	8	8	8	8	8	8	8	9	8	1
637	32	0	1	0	0	0	0	3	7	7	7	6	6	7	7	7	6.71429	0
641	20	1	0	0	1	0	1	3	9	9	8	8	8	7	9	8	8.28571	0
642	29	1	1	0	1	0	0	2	6	7	5	5	5	5	9	7	6	0
643	25	1	0	0	1	0	0	3	10	5	8	8	8	0	10	8	7	0
644	40	1	1	0	0	0	1	3	5	5	8	9	9	8	8	7	7.42857	1
645	31	1	1	0	0	0	1	2	8	6	10	10	10	7	9	10	8.57143	1
647	29	0	0	1	1	1	1	3	8	9	8	10	10	9	10	9	9.14286	0
648	27	1		1	1	1	1	3	10	10	10	10	10	10	10	10	10	0
649	25	1	1	0	0	0	1	3	10	10	10	10	10	10	9	9	9.85714	0
651	39	1	1	1	1	1	0	4	5	8	6	6	6	6	9	8	6.57143	0
653	18	0	0	0	1	0		4	7	6	8	7	9	10	10	8	8.14286	0
654	18	0	0	0	1	0	0	3	3	5	4	4	5	5	7	6	4.71429	1
655	18	0	0	0	1	0	1	3	8	8	9	9	9	10	9	9	8.85714	1
656	24	0	0	0	0	0	1	2	10	10	10	10	10	10	10	10	10	0
657	24	0	0	0	1	0	1	4	10	10	9	9	9	10	9	9	9.42857	0
658	27	1	0	0	1	0	0	4	10	10	10	6	7	5	10	8	8.28571	0
659	22	0	0	1	1	0	1	3	6	4	6	6	6	6	6	6	5.71429	1
660	21	1	0	0	1	0	1	3	7	7	7	6	6	4	7	7	6.28571	0
661	37	1	1	0	1	0	1	3	5	6	8	6	5	5	9	9	6.28571	0
676	19	1	0	0	0	0	1	3	3	3	10	5	5	3	7	4	5.14286	0
677	18	1	0	0	0	0	1	2	6	6	6	7	5	4	6	6	5.71429	0
678	20	1	0	0	1	0	1	3	6	4	8	8	8	5	8	6	6.71429	1
679	21	0	0	1	1	0		4	6	6	6	6	6	6	6	6	6	0
680	20	0	0	0	0	0	0	3	3	6	3	3	2	7	5	2	4.14286	1
681	26	1	0	0	1	0	1	3	7	7	8	9	9	7	8	7	7.85714	0
682	30	0	0	0	0	0	0	3	8	8	6	5	6	6	8	8	6.71429	1
683	30	1	0	0	0	0	1	3	8	8	9	9	10	5	10	9	8.42857	0
684	30	1	1	0	0	0	1	3	8	10	8	9	10	2	5	8	7.42857	0
685	27	0	1	0	1	0	1	4	8	8	8	8	7	7	6	8	7.42857	1
692	19	1	0	0	0	0	1	3	7	1	10	10	10	1	1	5	5.71429	1
693	21	1	0	0	0	0		3	7	5	5	2	4	6	6	4	5	1
694	21	1	0	0	1	0		3	3	4	3	3	3	1	2	4	2.71429	1
695	20	0	0	0	0	0	0	3	7	7	3	2	4	7	10	5	5.71429	0
696	21	1	0	0	1	0	1	4	8	9	10	9	9	9	9	8	9	1
697	21	1	0	0	1	0	1	3	6	5	8	8	8	8	4	6	6.71429	0
698	20	1	0	0	1	0	1	2	9	9	9	9	9	9	8	10	8.85714	1
699	20	1	0	1	0	0	1	3	6	3		2	7	7	10	5
700	21	1	0	0	1	0	1	4	6	4	8	8	8	7	8	7	7	1
701	21	1	0	1	0	0	1	3	8	8	5	6	6	2	5	7	5.71429	1
702	39	1	0	1	0	0	1	2	4	4	5	4	4	3	3	4	3.85714	1
703	24	1	1	0	1	0	1	3	10	10	10	10	10	10	10	10	10	0
704	37	1	1	1	0	0	1	3	9	9	10	10	10	10	10	10	9.71429	0
705	28	1	1	1	0	0	0	2	6	6	6	6	5	2	3	5	4.85714	1
706	25	1	0	1	0	1	1	2	8	8	4	4	4	2	6	6	5.14286	0
707	28	1	0	0	1	0	1	3	10	10	10	8	9	0	10	10	8.14286	0
708	26	1	1	1	0	0		2	7	8	6	6	6	4	5	6	6	1
709	25	1	0	1	0	0	1	4	9	8	10	10	10	10	10	10	9.57143	0
710	27	1	0	0	1	0	1	2	7	7	9	9	9	6	9	7	8	1
711	26	1	0	0	0	0	1	2	7	7	7	5	5	4	4	7	5.57143	1
712	23	1	0	0	1	0	0	2	7	2	0	0	0	0	6	0	2.14286	1
713	28	0	0	1	0	0	1	3	5	6	7	6	7	3	5	6	5.57143	1
714	38	1	1	0	1	0	1	3	7	6	8	8	8	8	8	8	7.57143	0
715	31	1	1	1	0	0	1	2	6	6	8	7	4	1	6	6	5.42857	1
716	26	1	2	1	0	0	0	2	5	7	2	5	8	0	7	0	4.85714	0
717	28	1	0	1	0	0	1	3	5	3	7	7	7	7	1	8	5.28571	1
718	21	1	0	1	0	0	1	2	8	9	9	9	9	9	9	9	8.85714	1
719	37	1	0	1	0	0	0	3	5	5	5	5	5	5	5	5	5	0
720	22	1	0	0	0	0	0	2	2	5	4	2	2	1	1	2	2.42857	0
721	28	1	0	1	1	1	1	3	10	10	10	10	10	10	10	10	10	1
722	40	1	1	1	0	0	1	2	9	9	8	9	9	6	9	9	8.42857	0
723	21	1	0	1	1	0	0	2	4	4	1	0	0	0	5	4	2	1
724	35	1	1	1	0	0	1	3	10	10	10	10	10	10	10	10	10	0
725	25	1	2	0	0	0	0	1	7	7	0	2	2	0	5	6	3.28571	0
727	27	1	0	0	0	0	1	3	7	7	8	8	8	2	6	9	6.57143	0
728	36	1		1	1	1	1	1	9	9	9	9	10	0	9	10	7.85714	0
729	19	1	0	0	1	0	1	2	8	8	7	7	7	6	8	9	7.28571	0
730	20	1	0	0	1	0	1	3	7	7	6	6	3	3	9	8	5.85714	0
731	22	1	1	1	1	0	1	2	6	6	6	5	5	6	6	7	5.71429	1
732	26	1	0	1	1	0	0	2	6	6	4	1	4	4	9	5	4.85714	0
733	20	1	0	0	0	0	1	2	7	7	5	4	5	5	5	8	5.42857	0
734	20	1	0	1	1	0	1	3	8	8	8	8	7	6	7	8	7.42857	0
735	40	1	1	1	0	0	1	3	8	8	7	6	7	7	8	7	7.28571	0
736	22	1	0	1	0	0	0	3	5	3	1	2	5	3	8	5	3.85714	0
737	19	1	0	1	1	0	1	3	3		8	10	10	9	8	3
738	18	1	0	1	0	0	1	3	8	7	4	2	3	3	3	5	4.28571	0
739	18	1	0	1	1	0	1	3	8	8	6	6	8	8	8	7	7.42857	0
740	26	1	0	0	1	0	1	3	5	4	8	7	8	7	8	5	6.71429	0
741	19	0	0	0	0	0	1	3	7	7	7	7	7	7	7	7	7	0
742	19	1	0	1	1	0	1	3	7	4	8	9	9	8	9	7	7.71429	1
743	19	1	0	0	1	0	1	3	0	0	3	5	5	1	5	5	2.71429	1
744	20	1	0	1	0	0	1	3	10	10	10	10	10	10	10	10	10	0
745	21	1	0	0	1	0	1	3	8	6	9	10	8	8	8	9	8.14286	0
746	21	0	0	0	0		0	3	6	5	2	2	2	2	5	5	3.42857	0
747	19	1	0	0	1	0	1	2		3	4	3	7	7	7	4
748	18	1	0	0	0	0	1	3	5		10	8	10	10	10	7
750	18	0	0	0	1	0	0	2	7	7	7	7	7	2	2	6	5.57143	1
751	23	1	0	0	1	0	1	3	8	7	8	9	9	8	9	8	8.28571	0
752	20	0	0	0	0	0	1	4	8	8	7	8	8	2	8	7	7	1
753	20	1	0	0	1	0	1	2	7	6	10	10	8	6	8	10	7.85714	1
754	18	1	0	1	1	0	1	3	6	3	4	8	7	2	6	7	5.14286	1
755	20	0	0	0	0	0	1	4	8	6	10	10	10	7	10	9	8.71429	1
756	24	1	0	0	0	0	1	4	8	8	9	8	8	6	6	7	7.57143	0
757	19	1	0	0	1	0	1	3	5	6	8	9	8	10		7
758	19	1	0	0	1	0	1	4	9	7	8	6	8	4	8	7	7.14286	1
759	20	0	0	0	1	0	1	3	9	9	7	5	7	7	5	8	7	1
760	24	1	0	0	1	0	1	2	8	8	9	10	10	4	9	10	8.28571	0
761	22	1	0	0	1	0	1	3	10	10	10	10	10	10	10	10	10	0
762	21	1	0	0	1	0	1	3	7	6	6	6	6	8	6	7	6.42857	1
763	19	0	0	0	1	0	1	3	7	7	7	7	7	7	7	7	7	1
764	19	1	0	0	0	0	1	3	7	8	8	8	9	8	7	8	7.85714	1
765	21	1	0	0	1	0	1	3	4	4	4	4	4	2	2	5	3.42857	0
766	21	1	0	0	1	0	1	3	7	7	9	8	9	4	6	8	7.14286	0
767	20	1	0	0	1	0	1	3	7	7	6	4	8	8	10	6	7.14286	1
768	39	0	1	0	0	0	1	4	9	9	9	9	10	6	9	9	8.71429	0
769	35	1	1	0	1	0	1	3	10	10	10	10	10	7	10	10	9.57143	0
770	27	0	0	0	1	0	1	2	7	7	7	7	7	7	9	8	7.28571	1
771	25	1	0	0	1	1	1	3	10	10	10	10	10	8	10	10	9.71429	1
773	25	1	0	1	1	0	1	3	7	9	9	10	10	10	10	10	9.28571	1
774	27	1	0	0	1	0	1	4	8	6	8	8	8	6	8	8	7.42857	1
775	23	1	0	0	1	0	1	4	7	8	6	10	10	8	10	9	8.42857	0
776	23	1	0	0	1	1	1	4	5	7	7	7	7	6	8	6	6.71429	1
777	27	0	0	0	1	0	0	4	8	6		10	10	3	8	8
778	22	1	0	0	1	0	1	3	8	7	9	9	9	10	10	9	8.85714	0
779	23	1	0	0	1	0	1	4	10	10	10	10	10	8	10	9	9.71429	1
780	24	1	0	1	0	0	1	2	8	9	10	10	10	10	6	8	9	1
781	20	1	0	0	0	0	1	3	4	5	6	6	6	3	3	7	4.71429	0
782	19	1	0	1	0	0	1	4	8	8	7	7	8	8	8	8	7.71429	0
783	18	1	0	0	1	0	1	4	8	9	8	7	8	7	8	9	7.85714	1
784	18	1	0	0	1	0	1	3	4	6	6		6	6	6	8
785	23	0	0	0	1	0	1	2	7	7	8	7	8	6	6	7	7	1
786	19	1	0	0	0	0	1	2	7	7	8	3	9	8	8	9	7.14286	1
787	26	0	0	0	1	0	0	2	6	6	3	3	3	3	3	2	3.85714	1
788	33	0	0	0	0	0	1	3	10	10	9	7	7	7	8	9	8.28571	0
789	20	1		0	1	0	1	3	7	7	8	8	8	8	8	8	7.71429	1
790	32	0	0	0	1	0	0	2	7	7	5	6	6	6	10	7	6.71429	1
792	24	1	1	0	0	0	0	1	7	9	2	2	2	4	2	7	4	0
793	31	1	0	0	1	0		3	7	6	7	7	6	5	7	8	6.42857	0
794	28	0	0	0	1	0	1	3	8	10	10	8	10	8	10	10	9.14286	1
795	28	1	1	0	1	0	1	4	4	4	4	4	4	3	5	5	4	1
796	21	1	0	0	0	0	1	3	7	7	7	8	8	8	10	7	7.85714	1
797	21	0	0	0	1	0	1	3	8	8	9	9	9	8	9	9	8.57143	1
798	23	0	0	0	1	0	1	3	8	9	8	8	8	7	8	8	8	1
800	18	1	2	0	1	0	1	2	8	8	10	9	9	9	9	8	8.85714	1
801	36	1	0	1	0	0	1	2	8	8	9	7	7	7	9	9	7.85714	0
802	31	1	1	1	1	0	1	4	5	4	6	4		2	8	7
803	29	1	1	1	0	1	1	3	7	7	7	7	10	7	5	8	7.14286	1
808	28	1	0	0	1	0	0	2	7	7	6	6	5	6	7	7	6.28571	1
809	31	1	0	1	0	0	1	3	7	8	8	7	7	8	7	9	7.42857	1
810	31	1	1	0	1	0	0	3	5	3	1	0	0	0	4	1	1.85714	1
812	30	1	0	0	1	0	0	3	7	5		5	8	6	3	6
813	33	1	0	0	1	0	1	3	10	10	10	10	10	10	10	10	10	0
814	29	1	1	0	1	0	1	3	10	10	10	10	10	10	10	10	10	0
815	20	0	0	0	1	0	1	2	7	7	7	7	7	7	7	7	7	1
816	25	0	0	0	0	0	0	2	3	3	8	0	0	0	9	7	3.28571	1
819	32	1	1	0	0	0	1	3	9	8	8	8	9	4	7	8	7.57143	1
820	35	0	1	0	1	0	1	3	8	8	9	9	9	9	10	9	8.85714	0
821	22	0	0	1	0	1	0	3	7	7	5	4	5	8	7	6	6.14286	1
822	18	1	0	0	1	0	1	4	9	8	9	9	9	5	4	8	7.57143	1
825	37	0	1	0	0	0	1	3	10	10	10	10	10	10	10	10	10	1
826	23	1	0	0	1	0	1	4	8	7	9	10	10	5	10	8	8.42857	0
827	26	1	0	0	1	0	1	4	5	8	9	9	9	9	9	6	8.28571	1
828	24	1	0	0	1	0	1	4	7	6	7	8	8	8	9	7	7.57143	0
830	29	0	0	0	1	0	1	4	7	8	9	8	8	8	8	8	8	1
845	40	1	0	1	0	0	0	2	2	2	0	1	1	2	2	1	1.42857	1
851	26	0	1	0	1	0	1	2	7	7	7	6	7	6	7	7	6.71429	1
854	35	0	1	0	0	0	0	3	6	4	3	3	3	3	7	3	4.14286	0
855	36	1	1	0	0	0	0	4	2	2	5	4	4	4	0	4	3	1
856	27	1	0	0	1	0	1	3	10	10	10	9	9	9	10	9	9.57143	1
880	39	1	1	0	1	0	1	3	6	6	6	7	6	6	7	8	6.28571	1
881	26	1	0	0	0	0	1	3	5	6	6	6	6	10		7
882	24	0	0	0	1	0	1	4	8	8	8	7	7	7	6	8	7.28571	0
883	27	0	0	0	0	0	1	3	8	8	8	9	9	5	6	8	7.57143	0
884	37	0	1	0	0	0	1	4	4		3	2	6		7	9
885	38	1	1	0	1	0	1	2	5	5	5	5	5	5	9	5	5.57143	1
886	36	1	1	1	0	0	1	3	8	8	8	8	8	8	8	8	8	1
887	29	1	0	0	1	0	1	3	6	4	6	5	10	9	10	7	7.14286	1
888	25	1	0	0	1	0	0	4	6	5	7	7	7	8	9	7	7	0
889	30	0	0	0	1	0	1	4	9	9	9	6	6	9		9
890	34	1	1	0	1	0	1	3	10	6	10	10	10	5	10	9	8.71429	0
891	26	1	0	0	1	0	1	2	9	9	9	9	9	6	10	9	8.71429	1
892	30	0	1	1	1	0	1	2	10	10	10	10	10	10	10	10	10	1
893	26	0	0	0	0	0	1	3	4	5	5	4	5	4	3	5	4.28571	0
895	26	1	0	0	1	0	1	3	7	7	7	8	9	9	9	7	8	0
896	28	0	0	0	1	0	1	3	6	7	8	3	7	6	6	6	6.14286	1
897	25	1	0	0	1	0	1	4	3	7	7	6	7	7	8	8	6.42857	0
899	32	1	0	0	1	0	1	3	10	10	10	8	10	10	10	9	9.71429	1
900	27	0	0	0	1	0	1	2	8	8	8	7	7	5	8	8	7.28571	1
901	28	1	0	0	0	0	1	2	8	8	6	6	6	8	8	8	7.14286	0
902	37	0	1	0	1	0	1	3	7	7	5	5	7	7	9	4	6.71429	0
903	27	1	0	0	1	0	1	3	9	9	9	9	9	7	5	8	8.14286	0
904	23	0	0	0	1	0	1	4	7	7	6	6	6	5	10	7	6.71429	0
905	24	0	0	1	1	0	1	4	9	8	6	8	8	5	5	7	7	1
907	30	0	0	0	1	0	1	3	9	9	9	9	9	8	8	9	8.71429	1
908	25	1	0	0	0	0	1	3	7	7	10	10	10	10	10	10	9.14286	0
909	31	1	1	1	1	1	1	2	10	10	10	10		2	10	9
910	29	1	0	0	0	0	1	4	10	10	9	10	10	10	10	10	9.85714	0
911	27	0	1	0	0	0	1	2	7	7	8	9	9	9	10	8	8.42857	1
913	26	0	0	0	1	0	1	4	5	6	9	10	10	7	7	7	7.71429	1
914	28	1	0	0	1	0	1	4	6	6	6	4	7	7	8	6	6.28571	1
915	27	1	0	0	1	0	1	3	8	8	9	9	10	10	10	9	9.14286	1
916	30	1	0	0	0	0	1	4	8	8	7	7	8	8	8	7	7.71429	1
917	27	1	0	0	1	0	1	3	7	7	8	8	9	7	8	8	7.71429	1
918	26	1	0	0	1	0	0	3	7	7	5	5	7	7	7	7	6.42857	1
919	27	1	0	0	1	0	1	4	10	10	10	10	10	10	10	10	10	1
920	28	0	1	0	0	0	1	3	9	9	8	7	7	5	9	9	7.71429	0
922	25	1	0	0	1	0	0	4	4	4	4	4	1	9	4	5	4.28571	0
923	27	1	0	0	1	0	1	4	7	6	7	7	7	6	7	8	6.71429	0
924	36	0	1	0	1	0	1	4	8	8	7	9	9	5	9	8	7.85714	1
925	33	1	1	0	1	0	1	3	8	7	8	8	7	4	9	8	7.28571	1
926	26	0	1	0	1	0	1	3	7	7	5	4	6	3	7	8	5.57143	0
927	33	1	1	0	1	0	1	3	8	6	8	10	8	4	7	8	7.28571	1
928	27	1	0	1	1	0	1	3	9	9	10	10	10	7	7	10	8.85714	1
929	28	1	0	0	0	0	1	4	6	4	10	9	9	9	10	8	8.14286	0
930	25	1	0	0	0	0	1	3	8	8	8	5	8	6	8	8	7.28571	1
931	40	1	2	0	1	0	1	3	8	8	8	9	9	7	9	8	8.28571	0
932	33	0	0	0	1	0	1	3	7	7	7	9	8	4	9	7	7.28571	0
933	35	1	1	0	0	0	1	3	7	7	8	5	5	6	8	8	6.57143	0
934	40	1	1	1	1	1	1	3	5	4	8	8	8	4	8	9	6.42857	1
935	39	1	1	0	1	0	1	3	7	8	8	8	8	5		7
943	37	0	0	0	0	0	1	1	9	9	5	3	5	5	6	10	6	0
944	26	1	2	0	0	0	1	3	8	8	8	8	8	8	8	8	8	0
945	28	1	0	0	1	0	1	3	9	9	8	9	10	8	10	10	9	1
946	36	0	1	0	0	0	1	3	5	5	5	5	5	3	6	5	4.85714	1
947	33	1	0	1	0	0	1	2	8	8	8	6	7	6	7	8	7.14286	1
948	38	1	1	0	0	0	1	3	8	8	10	10	10	10	10	9	9.42857	0
949	37	1	1	0	1	0	1	4	7	7	7	7	7	5	10	8	7.14286	0
950	37	0	1	0	1	0	1	3	7	7	7	7	7	7	7	7	7	0
951	31	1	0	0	1	0	1	3	9	8	10	10	10	9	10	9	9.42857	1
952	23	0	0	0	1	0	1	2	7	5	8	9	8	9	9	9	7.85714	1
954	26	0	0	0	1	0	1	3	5	5	7	4	7	9	7	8	6.28571	1
955	32	1	0	0	0	0	1	3	8	4	9	9	9	9	10	9	8.28571	1
956	36	1	0	0	0	0	1	4	9	9	9	9	9	9	9	9	9	1
958	31	0	0	0	1	0	0	2	8	7	6	6	6	6	7	7	6.57143	1
959	34	1	0	0	0	0	1	3	8	8	9	10	10	10	10	9	9.28571	1
960	38	1	1	0	0	0	1	3	8	9	9	9	9	9	9	9	8.85714	0
961	32	0	1	0	0	0	1	3	9	9	6	6	6	6	7	7	7	1
976	21	1	0	0	1	0	0	3	4	7	3	0	4	3	7	5	4	0
977	22	1	1	0	1	0	1	2	7	1	5	10	8	8	10	9	7	0
980	36	1	1	0	1	0	1	3	5	5	5	2	7	1	9	8	4.85714	1
981	26	0	0	0	0	0	0	3	6	5	6	4	9	9	9	7	6.85714	1
982	24	1	0	0	1	0	1	3	7	5	7	7	7	7	7	8	6.71429	0
983	35	1	2	0	1	0	0	3	3	3	4	4	4	0	4	4	3.14286	0
984	27	1	0	0	1	0	1	4	7	6	7	7	7	7	7	7	6.85714	1
985	31	1	1	0	1	0	1	3	9	7	9	9	9	9	9	9	8.71429	1
986	33	1	0	0	0	0	1	4	8	8	9	8	9	6	10	9	8.28571	1
987	33	0	0	0	1	0	1	3	7	7	9	7	7	5	7	7	7	1
988	33	0	1	0	0	0	1	3	7	7	8	8	8	7	7	7	7.42857	1
989	31	0	1	0	0	0	1	2	10	10	10	10	10	10	10	10	10	0
991	32	1	0	0	1	0	1	3	5	5	5	3	5	0	7	5	4.28571	0
992	24	1	1	1	0	0	1	2	6	5	7	7	7	3	8	6	6.14286	1
993	32	1	1	0	1	0	1	3	8	10	10	10	10	7	10	8	9.28571	0
994	20	0	0	0	1	0	1	4	7	7	6	5	9	8	4	6	6.57143	1
995	26	1	0	0	0	0	1	4	7	7	9	8	8	8	7	8	7.71429	0
996	34	0	1	0	1	0	1	3	8	8	7	8	8	6	9	9	7.71429	1
997	31	1	1	0	1	0	1	4	7	6	8	8	10	9	10	8	8.28571	0
998	36	1	0	0	0	0	1	3	5	5	9	8	8	8	8	9	7.28571	0
1000	38	1	1	0	1	0	1	3	8	5	7	6	9	8	7	9	7.14286	0
1001	26	0	0	0	1	0	0	4	7	7	8	7	7	4	7	7	6.71429	0
1002	38	0	0	0	0	0	1	4	9	9	10	10	10	10	10	10	9.71429	0
1004	26	1	0	0	0	0	1	2	8	9	9	8	9	8	9	9	8.57143	1
1006	27	0	0	1	0	1	1	3	8	8	8	8	8	8	8	8	8	0
1007	34	1	1	1	1	1	1	3	10	10	10	10	8	8	10	9	9.42857	0
1008	32	0	1	0	1	0	0	2	8	8	7	7	7	7	7	8	7.28571	1
1009	38	1	1	1	1	1	1	3	7	7	7	7	7	7	10	9	7.42857	1
1010	32	1	0	0	1	0	1	3	8	8	8	7	7	5	6	8	7	0
1011	27	0	0	1	0	1		4	7	7	7	6	7	7	8	8	7	0
1012	32	1	0	0	0	0	1	3	7	5	6	6	6	5	3	7	5.42857	0
1014	33	1	0	0	1	0	1	3	7	7	7	7	7	5	5	7	6.42857	1
1016	30	1	0	0	1	0	0	4	7	7	6	8	8	3	7	7	6.57143	0
1018	21	1	0	0	1	0	1	3	5	2	9	9	9	9	9	7	7.42857	1
1023	37	1	1	0	1	0	0	2	2	8	2	1	0	8	10	6	4.42857	0
1026	22	1	0	0	1	0	0	3	5	4	1	1	1	1	5	4	2.57143	0
1027	23	0	0	0	1	0	1	4	9	9	9	9	9	9	9	9	9	1
1028	32	1	0	0	0	0	0	3	5	4	4	2	3	4	5	4	3.85714	0
1029	22	1	0	0	1	0	0	4	3	3	4	10	4	1	7	4	4.57143	0
1030	20	1	0	0	0	0	0	4	8	8	6	6	6	4	9	8	6.71429	0
1031	20	1	0	0	1	0	1	4	8	8	9	10	10	9	10	9	9.14286	0
1032	21	0	0	0	0	0	0	4	9	8	3	3	10	10	10	7	7.57143	0
1033	19	0	0	0	0	0	1	2	8	8	10	10	10	10	10	8	9.42857	0
1034	19	1	0	0	1	0	1	4	7	7	9	9	9	9	9	9	8.42857	0
1035	20	1	0	1	0	1	0	3	3	3	3	0	9	0	9	2	3.85714	1
1036	19	1	0	1	0	0	0	3	7	8	7	4	5	6	8	7	6.42857	1
1037	22	1	0	0	1	0	0	3	8	8	6	10	10	4	10	8	8	0
1038	19	0	0	0	1	0	0	3	6	6	8	3	10	9	10	8	7.42857	1
1039	24	0	0	0	0	0	1	3	7	7	6	3	6	6	8	7	6.14286	0
1040	19	1	0	0	1	0	1	4	6	6	7	6	6	8	8	7	6.71429	1
1041	20	1	0	0	1	0	1	3	6	2	8	8	8	1	8	5	5.85714	1
1042	19	1	0	0	1	0	1	3	6	6	6	6	5	5	6	7	5.71429	1
1043	20	0	0	0	0	0	1	4	8	8	7	8	8	8	8	8	7.85714	1
1044	18	1	0	0	1	0	1	4	8	7	10	10	10	9	10	10	9.14286	1
1045	19	1	0	1	1	0	1	4	5	3	4	7	7	5	7	5	5.42857	0
1046	21	1	0	0	1	0	1	3	8	7	8	8	9	9	9	9	8.28571	0
1058	21	1	0	0	1	0	1	4	5	4	8	9	9	9	9	7	7.57143	1
1059	20	1	0	0	1	0	1	3	7	6	8	8	5	8	9	7	7.28571	1
1060	20	1	0	0	1	1	1	4	9	8	8	8	8	6	8	8	7.85714	1
1061	22	1	0	0	1	0	1	3	6	6	7	9	9	9	9	8	7.85714	1
1062	24	1	0	0	1	0	1	3	9	8	10	10	10	7	10	9	9.14286	0
1063	22	1	0	1	1	0	1	3	2	2	3	4	5	3	7	5	3.71429	0
1064	24	1	0	0	1	1	1	3	8	5	9	10	10	9	10	8	8.71429	1
1065	20	1	0	0	1	0	1	3	3	4	4	7	6	6	6	4	5.14286	1
1067	21	0	0	0	1	0	1	4	8	7	10	9	10	6	9	8	8.42857	0
1068	20	1	0	0	1	0	0	3	5	4	7	8	4	1	5	5	4.85714	0
1069	28	0	0	0	1	0	1	3	8	8	8	8	8	8	8	8	8	0
1070	23	1	0	0	1	0	1	3	9	9	9	6	9	9	9	9	8.57143	0
1071	20	1	0	0	1	0	1	4	8	8	8	2	6	7	6	5	6.42857	0
1072	21	1	0	0	1	0	1	3	6	6	8	8	8	8	8	10	7.42857	0
1073	21	1	0	0	1	0	0	3	7	7	5	3	9	9	2	6	6	0
1074	22	0	0	0	1	0	1	2	8	7	8	8	9	8	8	8	8	1
1075	21	0	0	0	1	0	1	4	6	6	6	6	6	6	6	6	6	1
1077	23	0	0	0	0	0	1	2	3	2	4	4	4	5	8	3	4.28571	0
1078	21	0	0	0	1	0	1	2	7	7	8	9	9	8	10	8	8.28571	0
1079	21	0	0	0	1	0	1	4	3	3	9	8	9	9	9	7	7.14286	0
1080	22	0	0	1	0	1	1	3	5	5	5	5	5	5	5	5	5	1
1081	23	0	0	0	1	0	0	3	6	5	5	7	4	4	8	6	5.57143	1
1082	23	0	0	0	1	0	1	4	8	7	10	10	10	9	10	10	9.14286	0
1083	21	1	0	0	1	0	1	3	6	5	8	5	9	5	9	7	6.71429	1
1084	21	1	0	0	0	0	1	3	7	5	6	6	6	7	7	7	6.28571	0
1085	24	1	0	0	1	0	1	3	7	7	7	10	10	10	6	8	8.14286	0
1086	23	1	0	0	1	0	1	4	10	8		9	10	10	10	9
1087	21	1	0	0	1	0	1	4	5	5	8	8	6	7	10	8	7	1
1088	22	1	0	0	1	0	1	3	5	5	10	10	10	10	10	7	8.57143	0
1089	20	1	0	0	1	0	0	3	5	6	5	4	4	4	7	5	5	0
1090	21	1	0	0	0	0	1	4	7	9	7	6	9	8	9	9	7.85714	1
1091	21	1	0	0	1	0	1	4	6	6	8	9	8	7	9	7	7.57143	1
1092	20	1	0	0	1	0	1	3	7	7	9	9	9	7	9	9	8.14286	0
1093	22	1	0	0	1	0	1	3	10	10	10	8	10	8	10	9	9.42857	1
1094	22	1	0	0	1	0	1	3	8	8	8	7	8	5	8	8	7.42857	1
1095	21	1	0	0	1	0	1	4	9	8	9	8	8	8	10	9	8.57143	1
1096	24	0	0	0	0	0	1	3	10	10	10	10	10	10	10	10	10	0
1097	24	1	0	0	1	0	1	4	7	7	8	7	7	7	7	8	7.14286	0
1098	25	1	0	0	1	0	1	3	6	5	8	7	7	7	8	8	6.85714	0
1099	21	1	0	0	1	0	0	4	6	5	3	3	3	3	7	4	4.28571	0
1100	26	1	0	0	0	0	1	3	8	8	9	9	9	7	8	8	8.28571	0
1101	20	1	0	0	0	0	1	3	10	10	10	9	10	10	10	10	9.85714	0
1102	20	0	0	0	1	0	0	2	2	2	6	0	3	7	7	5	3.85714	1
1103	21	1	0	0	1	0	1	4	8	9	8	10	5	9	9	10	8.28571	0
1104	31	1	0	0	1	0	1	3	7	6		10	10	8	10	9
1105	21	0	0	0	1	0	0	2	5	4	1	7	5	10		3
1106	23	1	0	1	0	1	1	3	6	6	8	8	8	9	5	8	7.14286	0
1107	21	1	0	0	1	0	1	4	8	8	9	8	8	8	8	8	8.14286	0
1108	21	1	0	0	1	0	1	3	7	3	6	9	9	6	5	8	6.42857	1
1109	25	1	0	1	0	0	0	4		8	7	5	8	8	2	7
1110	21	1	0	0	1	0	1	3	7	9	9	9	9	9		8
1111	24	1	0	1	0	0	0	2	6	7	8	3	9	10		6
1112	19	0	0	0	1	0	1	4	7	5	6	6	6	6	5	7	5.85714	1
1113	24	0	0	0	0	0	0	2	6	6	6	6	6	6	6	6	6	0
1114	23	1	0	0	0	0	1	3	5	5	8	9	9	6	9	6	7.28571	1
1115	20	1	0	0	0	0	1	4	7	3	10	10	10	1	10	7	7.28571	1
1117	19	0	0	0	1	0	1	4	7	7	5	5	7	2	5	5	5.42857	1
1118	20	1	0	0	1	0	1	3	7	6	9	9	9	7	9	7	8	1
1119	20	0	0	0	1	0	0	4	7	7	6	6	7	4	4	5	5.85714	1
1120	21	1	0	0	0	1	1	3	7	8	5	2	3	6	8	7	5.57143	0
1121	19	0	0	0	0	0	1	4	7	7	7	7	8	6	7	8	7	0
1122	19	1	0	0	1	0	1	3	8	8	9	10	9	6	10	8	8.57143	0
1123	29	1	1	0	0	0	0	2	7	7	8	7	8	8	10	7	7.85714	0
1124	24	0	0	0	0	0	1	4	7	7	5	1	8	7	10	7	6.42857	1
1125	19	1	0	0	0	0	1	2	8	8	9	6	8	8	6	8	7.57143	0
1126	19	1	0	0	0	0	1	4	8	5	8	9	7	7	10	9	7.71429	0
1127	21	1	0	0	1	0	1	3	9	9	5	8	7	1	5	8	6.28571	0
1128	18	0	0	0	1	0	1	3	6	6	5	8	8	6	10	6	7	0
1129	19	1	0	0	1	0	1	4	8	7	9	8	9	8	10	8	8.42857	0
1130	19	0	0	0	1	0	1	4	8	8	9	9	9	9	9	9	8.71429	1
1131	34	1	1	0	1	0	1	3	10	10	10	10	10	8	10	10	9.71429	0
1132	23	1	0	0	0	0	1	3	9	9	8	7	5	3	8	7	7	1
1133	25	0	0	0	0	0	1	2	8	8	8	8	8	8	8	8	8	0
1134	27	0	0	0	1	0	0	4	4	4	4	5	3	2	6	4	4	1
1135	31	1	0	0	1	0	1	3	9	9	9	10	10	9	10	10	9.42857	0
1136	22	0	0	0	0	0	1	3	8	7	8	8	8	5	8	8	7.42857	1
1137	26	1	0	0	1	0	1	4	7	7	8	9	7	9	8	9	7.85714	0
1154	26	0	0	1	0	0	1	3	9	9	9	10	7	10	10	9	9.14286	1
1155	26	1	0	0	0	0	1	3	5	2	7	2	2	2	7	5	3.85714	1
1156	24	1	0	0	1	0	1	3	8	7	8	8	8	8	10	9	8.14286	1
1157	27	1	0	0	1	0	1	4	6	7	8	8	9	6	8	8	7.42857	0
1180	19	1	0	0	1	0	0	4	2	1	2	1	4	2	6	5	2.57143	0
1181	20	1	0	0	1	0	1	3	8	8	8	6	10	9	9	9	8.28571	1
1182	19	1	0	0	0	0	1	3	7	6	7	4	8	6	9	7	6.71429	1
1183	19	1	0	1	1	0	0	3	5	2	5	5	5	2	2	5	3.71429	0
1184	21	0	0	0	1	0	0	3	8	9	3	6	8	5	0	7	5.57143	1
1185	24	0	0	1	0	0	1	3	7	7	8	6	9	8	9	9	7.71429	1
1186	18	0	0	0	0	0	1	3	7	7	6	5	6	6	9	8	6.57143	0
1188	23	1	1	0	0	0	0	3	8	7	1	1	4	0	6	5	3.85714	1
1189	25	1	0	0	1	0	1	4	7	7	8	7	8	5	10	7	7.42857	1
1190	31	0	1	0	1	0	1	3	6	7	6	6	7	2	3	6	5.28571	1
1191	39	1	1	0	0	0	1	2	8	7	7	5	5	5	7	8	6.28571	1
1192	24	1	0	0	1	0	1	4	8	4	8	8	8	8	9	9	7.57143	0
1193	23	1	0	0	1	0	1	4	6	5	9	9	7	7	9	8	7.42857	1
1209	23	1	1	1	1	0	1	1	9	9	10	10	10	9	5	10	8.85714	0
1213	29	1	0	0	0	0	1	3	8	8	9	10	10	5	5	8	7.85714	1
1234	19	1	0	0	0	0	1	2	7	7	6	8	6	6	8	9	6.85714	1
1235	21	1	0	1	0	0	1	3	6	7	7	6	8	9	10	8	7.57143	0
1236	20	1	0	0	1	0	1	4	6	5	7	7	7	5	7	6	6.28571	1
1237	19	1	0	1	0	0	1	3	8	8	7	8	9	9	5	8	7.71429	1
1238	19	1	0	1	0	0	1	3	8	5	8	8	9	8	9	8	7.85714	0
1239	24	1	0	0	0	0	1	2	8	10	8	9	10	9	10	9	9.14286	1
1240	19	1	0	1	0	0	0	4	7	5	7	7	7	6	7	7	6.57143	1
1241	20	1	0	0	1	0	1	3	7	5	8	5	8	8	8	8	7	1
1242	19	1	0	1	0	0	0	3	5	5	2	0	1	1	5	3	2.71429	0
1243	28	1	1	0	1	0	1	3	8	7	8	7	7	7	9	8	7.57143	1
1244	39	1	1	0	1	0	1	3	9	9	9	10	10	7	9	8	9	1
1245	26	0	1	0	1	0	1	3	7	7	7	5	7	4	6	7	6.14286	0
1246	25	1	1	1	0	1	0	3	7	8	3	3	5	5	8	7	5.57143	1
1247	34	1	0	0	1	0	1	3	4	4	3	1	2	0	5	4	2.71429	1
1248	23	0	0	0	1	0	1	3	8	8	8	8	8	8	7	8	7.85714	0
1249	26	1	0	0	0	0	1	3	8	8	8	9	9	9	9	9	8.57143	0
1293	22	1	0	0	1	0	1	3	7	5	5	5	7	9	9	7	6.71429	1
1294	22	1	0	0	1	0	1	4	6	5	7	6	8	8	9	8	7	0
1299	24	1	0	0	1	0	1	3	9	9	10	10	10	8	10	9	9.42857	0
1300	37	1	0	0	1	0	1	3	5	5	4	4	5	7	7	6	5.28571	0
1301	36	1	0	0	1	0	1	2	7	4	5	8	8	4	8	7	6.28571	0
1302	36	0	1	0	1	0	1	4	9	9	9	9	9	9	9	9	9	1
1303	40	1	0	1	0	0	1	2	6	8	8	8	9	3	10	7	7.42857	0
1304	28	1	2	0	0	0	1	3	8	7	8	7	7	5	9	9	7.28571	0
1305	21	0	0	1	0	0	1	3	7	6	7	7	8	6	5	8	6.57143	1
1309	32	1	0	1	1	0	0	2	0	0	0	10	9	10	9	9	5.42857	0
1310	24	1	0	0	0	0	1	2	10	10	10	10	10	10	10	10	10	0
1322	31	1	0	0	1	0	1	4	8	8	8	8	8	8	8	9	8	1
1330	27	1	0	0	0	0	1	3	10	10	8	10	10	9	10	10	9.57143	1
1332	22	0	0	0	1	0	1	4	8	9	9	9	9	9	8	10	8.71429	0
1352	22	0	0	1	0	0	0	4	7	7	5	5	5	5	5	6	5.57143	1
1353	23	1	0	0	1	0	1	4	7	7	8	7	8	10	10	7	8.14286	0
1354	28	1	0	0	1	0	1	3	9	10	10	9	10	10	6	10	9.14286	1
1355	34	0	0	0	1	0	0	3	5	5	5	5	5	5	10	5	5.71429	1
1356	20	0	0	0	0	0	1	3	10	10	9	7	9	10	10	9	9.28571	0
1357	18	0	0	0	0	0	1	4	5	5	4	10	10	0	10	4	6.28571	0
1358	22	1	0	0	1	0	1	3	7	7	3	7	10	10	10	8	7.71429	0
1360	39	0	1	0	0	0	0	3	5	5	4	0	0	0	9	5	3.28571	0
1361	28	0	0	0	1	0	1	3	8	8	10	7	7	5	6	8	7.28571	0
1398	22	1	1	1	0	0	1	1	8	10	7	8	7	0	9	10	7	0
1410	32	1	0	0	0	0	1	4	7	7	7	5	7	5	7	8	6.42857	1
1411	22	0	0	1	0	0	0	2	3	3	2	8	7	2	2	3	3.85714	0
1412	20	0	0	0	1	0	1	2	5	5	5	5	5	0	5	5	4.28571	1
1413	39	1	1	0	0	0	1	3	9	9	9	6	9	6	9	9	8.14286	0
1414	18	1	0	0	1	0	1	4	10	10	10	9	10	10	9	10	9.71429	0
1415	19	0	0	0	0	0	0	3	4	4	2	2	4	2	4	1	3.14286	1
1416	29	0	0	0	1	0	1	3	7	6	10	8	8	6	8	8	7.57143	0
1417	22	0	0	0	1	0		3	10	10	7	0	1	5	10	7	6.14286	0
1432	26	1	0	0	1	0	1	3	5	5	5	6	6	7	6	6	5.71429	1
1437	36	1	0	1	0	0	1	3	9	8	9	6	6	6	6	8	7.14286	1
1443	26	0	0	0	1	0	1	4	8	7	9	9	9	8	9	10	8.42857	1
1445	29	1	0	0	1	0	1	3	10	10	10	10	10	10	10	10	10	0
1467	38	1	1	0	1	0	1	3	9	9	9	9	9	9	9	9	9	0
1468	19	0	0	1	0	1	0	2	5	5	3	5	7	1	9	8	5	1
1469	21	0	0	1	0	1	0	2	3	4	3	2	4	2	4	4	3.14286	1
1470	40	0	0	0	1	0	0	3	6	7	6	6	6	6	6	6	6.14286	1
1471	35	0	0	1	0	0	0	2	8	10	1	1	1	1	1	7	3.28571	1
1472	22	0	0	0	0	0	0	3	3	3	5	4	2	4	6	5	3.85714	1
1473	26	1	0	0	0	0	0	4	6	4	5	9	9	2	8	6	6.14286	0
1522	18	1	0	1	0	0	1	2	7	8	7	10	10	5	10	8	8.14286	0
1524	32	1	2	0	1	0	1	3	6	4	8	8	8	4	8	6	6.57143	0
1525	26	1	0	0	0	0	1	3	10	10	10	10	10	10	10	10	10	0
1526	28	0	0	0	0	0	1	3	10	10	10	10	10	10	10	10	10	1
1527	35	0	0	0	0	0	1	3	7	7	7	8	8	8	9	8	7.71429	1
1528	30	1	0	1	0	0	1	4	5	5	5	5	5	5	5	5	5	0
1529	35	0	0	1	0	1	1	3	8	8	8	8	8	9	10	8	8.42857	1
1540	26	1	0	1	1	1	1	4	10	10	10	10	10	9	8	10	9.57143	1
1542	21	1	0	1	0	0		3	6	3	6	9	9	5	9	7	6.71429	0
1543	24	0	0	0	0	0	1	3	1	1	8	7	7	4	7	8	5	1
1545	26	1	0	0	1	0	1	4	9	8	8	7	8	4	9	8	7.57143	1
1571	20	0	0	0	1	1	1	3	7	6	8	9	9	10	9	7	8.28571	1
1572	19	1	0	0	1	0	1	3	7	7	8	10	10	0	10	6	7.42857	1
1573	32	0	0	1	1	0	1	4	5		7	5	7	7	7	8
1574	22	0	0	0	1	0	0	3	9	7	5	6	9	4	1	4	5.85714	0
1575	25	1	0	0	1	0	1	4	9	8	9	6	8	5	10	10	7.85714	0
1576	23	0	0	0	0	0	1	4	8	8	9	10	10	8	10	10	9	0
1578	30	0	0	0	1	0	1	4	8	8	8	9	9	9	9	9	8.57143	0
1580	18	0	0	0	0	0	1	2	8	6	8	9	9	10	9	9	8.42857	1
1581	19	1	0	0	1	0	1	2	7	6	8	7	6	4	7	8	6.42857	0
1583	32	1	1	1	0	0	1	3	8	8	9	9	9	6	9	10	8.28571	0
1584	20	1	0	0	1	0	1	4	7	7	8	8	8	8	7	7	7.57143	0
1585	20	1	0	0	1	0	1	3	8	7	9	9	9	9	9	9	8.57143	1
1605	24	1	0	0	1	0	1	4	8	8	8	8	8	9	9	9	8.28571	0
1606	24	0	0	0	1	0	1	4	7	3	8	6	5	8	9	6	6.57143	1
1628	21	1	0	0	0	0	1	4	6	4	8	6	8	7	8	8	6.71429	1
1631	22	1	0	0	0	0	1	4	7	5	7	8	8	5	9	8	7	1
1632	22	0	0	0	1	0	1	3	8	9	8	5	8	9	10	8	8.14286	1
1634	26	1	0	1	1	0	1	4	5	5	5	7	7	7	7	7	6.14286	1
1635	36	1	0	0	1	0		2	2	2	2	1	0		1	1
1636	24	0	0	0	1	0	1	2	8	8	7	5	7	4	8	8	6.71429	1
1637	26	1	1	0	1	0	0	2	8	8	7	9	7	6	4	8	7	1
1638	27	1	0	0	1	0	1	3	5	3	8	8	9	9	9	8	7.28571	0
1640	24	0	0	0	1	0	1	2	7	7	6	6	6	3	6	7	5.85714	1
1641	22	1	0	0	1	0	1	4	7	7	6	8	8	9	9	8	7.71429	1
1645	28	0	0	0	1	0	1	4	7	8	9	9	9	8	9	10	8.42857	0
1656	31	0	2	0	1	0	1	2	10	10	10	10	10	10	10	10	10	0
1657	25	1	0	0	1	0	1	3	9	9	10	10	10	10	10	9	9.71429	1
1658	23	1	0	0	1	0	1	3	7	5	9	9	9	9	10	8	8.28571	0
1659	23	0	0	1	0	1	1	4	6	6	7	8	7	7	8	7	7	1
1661	23	1	0	0	1	0	0	3	6	4	4	6	8	4	10	5	6	1
1664	28	1	0	0	1	0	1	3	10	10	10	10	10	6	10	10	9.42857	0
1672	24	1	0	0	0	0	1	4	7	6	8	6	7	7	9	7	7.14286	1
1674	31	1	0	0	1	0	1	2	5	5	9	0	0	8	9	9	5.14286	1
1683	31	1	0	0	1	0	1	3	7	7	7	6	7	2	3	7	5.57143	0
1684	21	1	0	0	1	0	1	3	7	7	8	8	6	6	7	7	7	1
1685	26	1	0	0	1	0	1	3	3	3	9	9	9	5	9	7	6.71429	0
1686	22	1	0	0	1	0	1	4	5	5	6	6	9	8	9	6	6.85714	0
1687	22	0	0	0	1	0	1	4	7	7	7	5	5	7	7	7	6.42857	1
1689	22	1	0	0	1	0	1	4	6	6	7	5	7	7	7	7	6.42857	1
1690	24	1	0	0	1	0	1	3	9	9	9	9	9	9	9	9	9	1
1699	29	1	1	0	1	0	1	3	8	10	8	10	10	7	10	9	9	1
1712	21	0	0	0	0	0	1	3	7	7	8	7	6	7	5	7	6.71429	1
1713	21	0	0	0	0	0	0	2	7	7	7	5	7	4	8	8	6.42857	0
1715	18	1	0	0	1	0	1	4
1716	19	1	0	0	1	0	1	3	7	5	9	8	10	6	5	7	7.14286	1
1717	19	1	0	0	1	0	1	4	7	8	8	8	8	8	8	7	7.85714	0
1718	26	0	0	0	1	0	1	4	8	8	8	8	8	7	7	8	7.71429	0
1727	29	1	2	0	0	0	1	3	9	9	6	7	7	5	2	5	6.42857	0
1740	26	1	0	0	0	0	1	4	10	10	10	5	10	10	10	10	9.28571	1
1741	22	1	0	0	1	0	1	4	5	0	7	9	7	8	6	6	6	0
1742	24	0	0	0	0	0	0	3	7	6	4	4	7	7	7	6	6	0
1743	22	0	0	0	1	0		3	6	6	8	10	10	9	10	8	8.42857	0
1744	23	1	0	0	1	0	1	4	8	8	7	6	8	9	10	8	8	0
1745	22	1	0	0	1	0	1	3	8	8	10	10	10	10	10	9	9.42857	0
1746	22	1	0	0	1	0	1	4	10	9	10	10	10	10	9	10	9.71429	1
1755	26	1	0	1	0	0	1	2	7	9	9	3	6	5	8	8	6.71429	1
1764	32	0	0	1	0	1	1	2	9	10	9	9	9	9	10	9	9.28571	1
1766	24	1	0	0	0	0	1	3	10	9	10	9	9	8	9	9	9.14286	0
1768	24	0	0	0	0	0	1	3	2	1	6	6	6	5	6	6	4.57143	1
1772	27	1	0	0	0	0	0	4	6	8	5	3	5	4	7	6	5.42857	0
1774	28	0	0	0	1	0	0	2	7	7	7	5	5	5	0	5	5.14286	0
1775	25	0	0	1	1	0	1	4	9	8	9	8	8	9	7	9	8.28571	0
1787	34	1	1	0	0	0	1	2	7	6	8	10	10	7	9	9	8.14286	1
1788	35	0	1	1	1	0	1	4	8	8	8	7	7	7	7	7	7.42857	0
1789	20	1	0	0	1	0	1	2	8	8	8	5	3	7	9	10	6.85714	1
1796	22	1	0	1	1	0	0	3	6	8	5	3	5	8	10	7	6.42857	1
1797	22	0	0	0	1	0	1	3	7	6		9	8	5	8	7
1798	22	0	0	0	1	1	0	4	7	7	5	9	5	3	9	5	6.42857	1
1799	23	0	0	0	1	0	1	4	8	8	8	6	7	6	8	8	7.28571	1
1800	23	1	0	0	1	0	1	3	7	5	8	10	10	8	10	7	8.28571	0
1801	25	1	0	0	1	0	1	2	5	3		10	10	9	10	8
1802	22	1	0	0	1	0	1	2	7	6	6	9	9	9	9	8	7.85714	0
1816	21	0	0	0	0	0	1	3	5		7	7	8	6	5	7
1822	25	1	0	0	1	0	1	3	8	8	9	9	8	8	8	9	8.28571	0
1824	29	1	1	0	1	0	1	3	7	5	9	9	10	9	10	10	8.42857	1
1826	24	0	0	0	1	0		1	6	4	9	9	10	8	8	7	7.71429	0
1827	28	1	0	0	1	0	1	2	8	6	8	10	10	0	8	8	7.14286	1
1830	27	1	0	0	0	0	0	3	7	6	6	6	6	8	5	7	6.28571	0
1831	40	0	1	0	0	0	0	4	7	5	4	3	6	6	8	6	5.57143	1
1832	23	1	0	0	1	0	1	4	10	10	10	6	10	9	10	9	9.28571	1
1833	27	1	0	0	0	0	1	3	9	9	9	7	8	8	8	9	8.28571	1
1834	39	0	1	0	0	0	1	2	8		6	6	4	7	9	6
1835	19	1	0	0	0	0	1	3	10	10	10	10	10	10	10	10	10	1
1836	28	1	0	1	1	0	1	3	9	9	9	9	9	9	9	10	9	1
1852	24	0	0	0	1	0	1	4	8	8	9	10	9	5	8	9	8.14286	0
1853	21	1	0	0	1	0	1	3	6	6	8	7	8	8	9	8	7.42857	0
1854	21	1	0	0	1	0	1	4	8	5	7	9	7	9	9	8	7.71429	0
1855	21	1	0	0	1	0	1	4	8	5	8	6	8	6	6	8	6.71429	1
1856	21	0	0	0	0	1	1	3	8	8	8	8	8	6	8	8	7.71429	0
1857	21	1	0	0	1	0	1	4	6	7	10	10	10	10	10	8	9	1
1866	25	0	0	0	1	0	1	2	8	8	8	8	8	5	8	8	7.57143	1
1867	27	0	0	0	0	0	1	2	9	9	9	9	9	8	10	10	9	1
1868	22	1	0	1	0	0	1	2	8	9	9	7	10	9	10	9	8.85714	0
1869	20	0	0	0	1	0	0	3	7	7	3	4	4	3	3	2	4.42857	0
1870	34	1	0	0	1	0	1	3	9	9	9	9	9	10	10	9	9.28571	0
1871	29	1	0	0	1	0	1	4	5	3	8	9	8	8	6	6	6.71429	1
1872	23	0	0	0	1	0		3	5	4	6	7	8	5	5	6	5.71429	0
1877	25	0	0	0	0	0	1	3	8	8	9	9	10	9	10	9	9	1
1880	25	1	0	0	1	0	1	2	9	9	7	6	6	6	9	8	7.42857	0
1883	24	0	0	0	1	0	1	3	6	5	9	7	7	9	9	6	7.42857	1
1884	23	1	0	0	1	0	0	4	5	5	8	6	10	10	6	5	7.14286	0
1885	32	1	0	0	0	0	1	2	10	10	10	10	10	10	10	10	10	0
1886	24	0	0	0	1	0	0	3	5	5	6	4	4	5	8	4	5.28571	1
1887	26	1	0	0	1	0	1	3	4	3	3	4	2	3	7	6	3.71429	0
1891	37	1	1	0	1	0	1	3	8	8	8	8	8	6	8	8	7.71429	1
1892	27	1	0	0	1	0	1	3	7	5	7	7	8	9	9	9	7.42857	0
1899	40	1	2	1	1	1	0	2	10	10	5	5	5	5	5	10	6.42857	0
1902	20	1	0	0	1	0	0	4	4	4	3	5	3	7	8	5	4.85714	0
1907	29	1	0	0	1	0	0	2	5	1	6	7	7	0	10	7	5.14286	1
1908	22	0	0	0	1	0	0	4	6	6	6	6	4	9	9	7	6.57143	0
1909	21	1	0	0	1	0	1	3	7	7	6	8	5	5	7	7	6.42857	0
1910	22	1	0	0	1	0	1	2	5	5	5	2	10	5	10	5	6	0
1911	25	1	0	0	1	0	0	4	7	6	8	8	8	8	8	8	7.57143	1
1912	24	0	0	0	1	0	1	4	10	10	10	7	10	8	10	8	9.28571	0
1913	23	0	0	1	0	0	1	3	7	6	7	8	8	7	6	7	7	0
1914	31	1	1	1	0	1	0	3	9	9	5	5	4	3	1	5	5.14286	1
1919	23	0	0	0	1	0	1	2	7	6	8	10	9	8	9	8	8.14286	0
1922	20	1	0	0	1	0	1	3	7	4	9	5	5	3	6	8	5.57143	1
1923	20	1	0	0	0	0	1	3	6	3	4	5	5	4	6	6	4.71429	1
1924	24	0	0	0	0	0	1	3	8	6	9	9	9	7	9	8	8.14286	0
1925	19	1	0	0	1	0	1	3	8	8	8	8	8	6	10	10	8	0
1928	20	0	0	0	1	0	0	2	8	4	5	2	2	3	7	8	4.42857	0
1931	38	0	1	0	0	0	0	4	6	5	6	4	5	6	7	6	5.57143	0
1933	24	1	0	0	1	0	1	3	8	9	10	9	10	10	9	8	9.28571	1
1934	23	1	0	0	1	0	1	4	5	5	7	9	9	6	7	7	6.85714	0
1935	26	1	0	0	1	0	1	3	8	8	8	8	8	8	8	8	8	0
1936	23	0	0	0	0	0	1	4	9	9	8	10	6	8	10	10	8.57143	0
1938	28	0	0	0	0	0	1	4	7	5	9	10	10	9	10	7	8.57143	0
1939	29	0	0	0	0	0	1	4	7	9	8	8	6	8	8	8	7.71429	0
1940	24	1	0	0	1	0	1	4	8	6	8	9	10	9	10	8	8.57143	0
1941	25	1	0	0	0	0	1	4	9	9	9	10	10	8	10	9	9.28571	1
1942	34	1	1	0	1	1	1	4	9	9	9	9	10	10	10	9	9.42857	1
1943	27	1	1	0	0	0	1	2
1944	24	1	0	0	1	0	1	3	5	5	10	10	9	7	10	8	8	1
1945	28	1	1	0	0	0	1	1	10	10	5		9	9		10
1946	19	1	0	0	1	0	1	3	8	8	8	8	8	6	6	7	7.42857	0
1947	26	1	0	0	1	0	1	4	5	5	5	4	5	6	6	7	5.14286	0
1948	36	0	0	0	1	0	0	3	7	7	7	7	7	7	7	7	7	0
1949	27	0	0	0	0	0	1	3	8	8	8	8	8	7	7	8	7.71429	1
1950	23	1	1	1	0	0	1	1	2	3	3		3	1	2	2
1978	34	1	0	0	0	0	0	3	3	4	2	1	1	9	9	5	4.14286	0
1980	30	0	0	0	0	1	0	3	8	9	10	6	7	7	5	5	7.42857	1
1981	24	1	1	0	1	0	1	2	5	5	5	5	4	9	9	8	6	1
1983	24	0	0	0	1	0	1	3	7	5	8	8	8	8	7	8	7.28571	1
1984	23	1	0	0	1	0	1	4	8	7	9	8	8	7	9	8	8	1
1985	25	1	0	0	1	0	1	2	7	7	9	8	7	6	5	7	7	1
1987	29	1	0	0	1	1	1	4	10	10	10	10	10	7	10	9	9.57143	1
1988	27	1	0	0	1	0	1	3	9	9	8	9	9	8	9	9	8.71429	0
1989	29	1	1	0	1	0	1	3	8	8	7	4	4	0	3	7	4.85714	0
1991	27	1	0	0	0	0	1	2	8	8	7	8	8	6	8	8	7.57143	0
1992	24	1	0	0	1	0	1	3	9	9	9	10	10	10	10	10	9.57143	1
1993	24	1	0	0	1	0	1	3	8	8	8	8	8	8	9	9	8.14286	1
1995	19	0	0	0	1	0	1	3	6	7	5	5	6	7	6	6	6	0
1997	31	1	0	0	1	0	1	4	9	9	9	10	10	8	10	9	9.28571	0
2001	34	1	0	0	1	0	1	3	8	8	8	8	9	9		9
2002	24	1	1	0	0	0	1	3	10	10	5	6	6	4	3	7	6.28571	1
2022	22	1	0	0	1	0	0	3	6	6	3	3	3	3	5	5	4.14286	0
2031	35	1	1	0	0	0	1	3	8	7	10	9	9	5	10	9	8.28571	1
2034	30	0	0	0	1	1	1	3	7	7	8	7	7	7	7	7	7.14286	1
2035	20	0	0	0	1	0	1	3	6	4	5	4	4	3	5	6	4.42857	0
2036	32	1	0	1	0	0	0	2	8	8	4	3	2	0	8	5	4.71429	0
2037	28	0	0	1	0	0	1	3	8	8	3	0	9	8	4	5	5.71429	0
2038	21	0	0	0	1	0	1	3	5	7	6	4	4	7	5	7	5.42857	0
2041	29	0	0	0	0	0	1	4	7	7	8	8	8	7	9	8	7.71429	0
2042	35	1	1	0	1	0	1	3	8	6	9	10	10	8	6	9	8.14286	1
2090	20	1	0	0	1	0	0	3	8	9	5	2	2	4	8	6	5.42857	1
2092	21	1	0	0	1	0	1	4	7	7	8	7	8	6	6	7	7	1
2093	19	0	0	0	0	0	1	4	8	8	8	8	8	8	8	8	8	1
2094	22	0	0	0	0	0	1	3	7	7	9	9	8	8	8	9	8	0
2095	19	0	0	0	0	0	1	2	7	7	8	8	9	7	6	6	7.42857	0
2096	30	1	0	0	1	0	0	3	5	5	5	5	5	5	5	5	5	0
2099	24	1	0	0	0	0	1	2	10	10	10	10	10	5	10	10	9.28571	1
2100	23	0	0	0	1	0	1	3	10	10	10	10	10	10	10	10	10	0
2101	26	0	0	1	1	0	1	3	8	7	8	8	6	5	5	8	6.71429	0
2102	22	1	0	0	1	0	1	3	7	8	10	10	10	10	10	8	9.28571	0
2103	20	0	0	0	0	0	1	4	10	8	9	7	8	6	8	10	8	1
2104	24	0	1	1	1	0	1	2	8	8	10	10	10	9	10	10	9.28571	0
2105	33	0	1	0	0	0	1	1	10	10	10	10	10	10	10	10	10	0
2106	34	1	1	0	0	0	1	2	10	10	10	10	10	10	10	10	10	0
2109	25	0	0	0	0	0	1	3	10	10	8	10	10	8	10	9	9.42857	1
2131	37	1	1	0	0	0	1	3	10	10	10	8	10	10	10	10	9.71429	0

## Sheet: Pilot
Code_identification	Age	Gender	Marital Status	Treatment	Have_ever_been_esthetic_treatement	in_Esthetic_Treatment	Like_Smile	Economic_Stratum	OES1	OES2	OES3	OES4	OES5	OES6	OES7	OES8
Pilot_1	27	1	0	0	0	0	1	3	10	10	8	10	10	9	10	10
Pilot_10	27	1	0	0	0	0	1	3	9	9	9	7	8	8	8	9
Pilot_11	28	0	0	0	1	0	1	4	7	8	9	9	9	8	9	10
Pilot_12	23	1	0	0	1	0	1	4	8	8	7	6	8	9	10	8
Pilot_13	25	0	0	1	1	0	1	4	9	8	9	8	8	9	7	9
Pilot_14	25	1	0	0	1	0	1	2	7	7	9	8	7	6	5	7
Pilot_15	24	1	0	0	0	0	1	4	8	8	9	8	8	6	6	7
Pilot_16	27	1	0	0	1	0	0	4	10	10	10	6	7	5	10	8
Pilot_17	27	1	1	0	1	0	1	3	10	7	10	10	10	9	10	9
Pilot_18	23	1	0	0	1	0	1	3	8	8	9	9	9	8	8	8
Pilot_19	31	1	0	0	1	0	1	4	8	8	8	8	8	8	8	9
Pilot_2	28	1	1	0	1	0	1	3	8	7	8	7	7	7	9	8
Pilot_20	26	1	0	0	1	0	1	3	5	5	5	6	6	7	6	6
Pilot_21	29	1	0	0	1	0	1	3	10	10	10	10	10	10	10	10
Pilot_22	24	1	0	0	0	0	1	3	10	9	10	9	9	8	9	9
Pilot_23	25	0	0	0	0	0	1	3	8	8	9	9	10	9	10	9
Pilot_24	29	1	0	0	1	1	1	4	10	10	10	10	10	7	10	9
Pilot_25	24	1	0	0	0	0	1	4	7	6	8	6	7	7	9	7
Pilot_26	26	1	0	0	1	0	1	4	9	8	8	7	8	4	9	8
Pilot_27	35	0	1	1	1	0	1	4	8	8	8	7	7	7	7	7
Pilot_28	27	1	0	0	1	0	1	3	9	9	8	9	9	8	9	9
Pilot_29	22	0	0	0	1	0	1	4	8	9	9	9	9	9	8	10
Pilot_3	37	1	1	0	0	0	1	3	10	10	10	8	10	10	10	10
Pilot_30	26	0	0	0	1	0	1	4	8	7	9	9	9	8	9	10
Pilot_31	26	1	0	0	1	0	1	3	4	3	3	4	2	3	7	6
Pilot_32	23	1	0	0	1	0	0	4	7	7	6	6	6	6	7	7
Pilot_33	28	1	0	0	1	0	1	3	10	10	10	10	10	6	10	10
Pilot_34	22	1	0	0	1	0	0	3	6	6	3	3	3	3	5	5
Pilot_35	35	1	1	0	0	0	1	3	8	7	10	9	9	5	10	9
Pilot_36	31	1	0	0	1	0	1	2	5	5	9	0	0	8	9	9
Pilot_37	18	1	0	1	0	0	1	2	7	8	7	10	10	5	10	8
Pilot_38	26	1	0	1	0	0	1	2	7	9	9	3	6	5	8	8
Pilot_39	40	1	2	1	1	1	0	2	10	10	5	5	5	5	5	10
Pilot_4	23	0	0	0	1	0	1	2	7	6	8	10	9	8	9	8
Pilot_40	37	0	0	0	0	0	1	1	9	9	5	3	5	5	6	10
Pilot_41	22	1	1	1	0	0	1	1	8	10	7	8	7	0	9	10
Pilot_42	37	0	1	0	1	0	1	3	7	7	5	5	7	7	9	4
Pilot_43	37	1	1	0	1	0	0	2	2	8	2	1	0	8	10	6
Pilot_44	32	1	0	1	1	0	0	2	0	0	0	10	9	10	9	9
Pilot_45	23	1	1	1	1	0	1	1	9	9	10	10	10	9	5	10
Pilot_46	28	1	0	0	1	0	0	2	7	7	6	6	5	6	7	7
Pilot_47	20	1	0	0	1	0	1	2	8	8	8	5	3	7	9	10
Pilot_48	39	1	1	0	1	0	1	3	6	6	6	7	6	6	7	8
Pilot_49	40	1	0	1	0	0	0	2	2	2	0	1	1	2	2	1
Pilot_5	31	1	0	0	1	0	1	3	7	7	7	6	7	2	3	7
Pilot_50	24	1	1	0	0	0	0	1	7	9	2	2	2	4	2	7
Pilot_51	24	1	0	0	1	0	1	4	7	7	8	7	7	7	7	8
Pilot_52	24	1	0	0	0	0	1	2	10	10	10	10	10	10	10	10
Pilot_53	29	1	2	0	0	0	1	3	9	9	6	7	7	5	2	5
Pilot_54	36	1	0	1	0	0	1	3	9	8	9	6	6	6	6	8
Pilot_55	39	1	1	0	1	0	1	3	9	9	9	10	10	7	9	8
Pilot_56	34	1	1	0	0	0	1	2	7	6	8	10	10	7	9	9
Pilot_57	31	1	1	1	0	1	0	3	9	9	5	5	4	3	1	5
Pilot_58	29	1	0	0	1	0	0	2	5	1	6	7	7	0	10	7
Pilot_6	32	1	0	0	0	0	1	4	7	7	7	5	7	5	7	8
Pilot_7	23	0	0	0	0	0	1	2	3	2	4	4	4	5	8	3
Pilot_8	29	1	0	0	0	0	1	3	8	8	9	10	10	5	5	8
Pilot_9	32	0	0	1	0	1	1	2	9	10	9	9	9	9	10	9
